# Imputation of ancient genomes

1  
2 Bárbara Sousa da Mota<sup>1,2</sup>, Simone Rubinacci<sup>1,2</sup>, Diana Ivette Cruz Dávalos<sup>1,2</sup>, Carlos Eduardo G.  
3 Amorim<sup>3</sup>, Martin Sikora<sup>4</sup>, Niels N. Johannsen<sup>5</sup>, Marzena Szmyt<sup>6</sup>, Piotr Włodarczak<sup>7</sup>, Anita  
4 Szczepanek<sup>7,8</sup>, Marcin M. Przybyła<sup>9</sup>, Hannes Schroeder<sup>10</sup>, Morten E. Allentoft<sup>11,4</sup>, Eske  
5 Willerslev<sup>4,12,13,14</sup>, Anna-Sapfo Malaspinas<sup>1,2\*</sup>@, Olivier Delaneau<sup>1,2\*</sup>@

6 <sup>1</sup>Department of Computational Biology, University of Lausanne, Switzerland

7 <sup>2</sup>Swiss Institute of Bioinformatics, University of Lausanne, Switzerland

8 <sup>3</sup>Department of Biology, California State University, Northridge, California, United States of America

9 <sup>4</sup>Lundbeck Foundation GeoGenetics Centre, Globe Institute, University of Copenhagen, Copenhagen, Denmark

10 <sup>5</sup>Department of Archaeology and Heritage Studies, Aarhus University, Denmark

11 <sup>6</sup>Institute for Eastern Research, Adam Mickiewicz University in Poznań, Poznań, Poland

12 <sup>7</sup>Institute of Archaeology and Ethnology, Polish Academy of Sciences, Kraków, Poland

13 <sup>8</sup>Department of Anatomy, Jagiellonian University, Medical College, Kraków, Poland

14 <sup>9</sup>Institute of Archaeology, Jagiellonian University, Kraków, Poland

15 <sup>10</sup>The Globe Institute, Faculty of Health and Medical Sciences, University of Copenhagen, Copenhagen,  
16 Denmark

17 <sup>11</sup>Trace and Environmental DNA (TrEnD) Laboratory, School of Molecular and Life Science, Curtin University,  
18 Australia

19 <sup>12</sup>GeoGenetics Group, Department of Zoology, University of Cambridge, Cambridge, UK

20 <sup>13</sup>Wellcome Sanger Institute, Wellcome Genome Campus, Cambridge, UK

21 <sup>14</sup>MARUM, University of Bremen, Bremen, Germany

22 \* Corresponding authors: [annasapfo.malaspinas@unil.ch](mailto:annasapfo.malaspinas@unil.ch), [olivier.delaneau@unil.ch](mailto:olivier.delaneau@unil.ch)

23 @ Joint last authors

## 24 Abstract

25 Due to *postmortem* DNA degradation, most ancient genomes sequenced to date have low depth of  
26 coverage, preventing the true underlying genotypes from being recovered. Genotype imputation has  
27 been put forward to improve genotyping accuracy for low-coverage genomes. However, it is  
28 unknown to what extent imputation of ancient genomes produces accurate genotypes and whether  
29 imputation introduces bias to downstream analyses. To address these questions, we downsampled  
30 43 ancient genomes, 42 of which are high-coverage (above 10x) and three constitute a trio (mother,  
31 father and son), from different times and continents to simulate data with coverage in the range of  
32 0.1x-2.0x and imputed these using state-of-the-art methods and reference panels. We assessed  
33 imputation accuracy across ancestries and depths of coverage. We found that ancient and modern  
34 DNA imputation accuracies were comparable. We imputed most of the 42 high-coverage genomes  
35 downsampled to 1x with low error rates (below 5%) and estimated higher error rates for African  
36 genomes, which are underrepresented in the reference panel. We used the ancient trio data to  
37 validate imputation and phasing results using an orthogonal approach based on Mendel's rules of  
38 inheritance. This resulted in imputation and switch error rates of 1.9% and 2.0%, respectively, for 1x  
39 genomes. We further compared the results of downstream analyses between imputed and high-  
40 coverage genomes, notably principal component analysis (PCA), genetic clustering, and runs of  
41 homozygosity (ROH). For these three approaches, we observed similar results between imputed  
42 and high-coverage genomes using depths of coverage of at least 0.5x, except for African genomes,  
43 for which the decreased imputation accuracy impacted ROH estimates. Altogether, these results  
44 suggest that, for most populations and depths of coverage as low as 0.5x, imputation is a reliable  
45 method with potential to expand and improve ancient DNA studies.

## 46 Introduction

47 Ancient DNA (aDNA) is characterized by pervasive *postmortem* damage, including fragmentation  
48 and deamination<sup>1</sup>. As a result, most ancient genomes have low breadth and depth of coverage,  
49 hindering confident genotype calling. Instead, pseudo-haploid data are commonly generated by

50 sampling one allele per variant site<sup>2,3</sup>. Evermore methods and tools are developed to study different  
51 aspects of population structure, including diploid genetic properties such as runs of homozygosity  
52 (ROH)<sup>4</sup>, using pseudo-haploid data. However, on the one hand, methods designed for diploid and  
53 haplotypic data cannot be easily applied to pseudo-haploid data, and, on the other hand, these data  
54 come with increased bias towards the reference genome<sup>5</sup>.

55

56 One alternative to downsampling the data to pseudo haploid prior to downstream analyses is to  
57 impute low-coverage ancient genomes. The goal of imputation is to infer missing sites, usually by  
58 using reference panels of haplotypes. Most imputation tools employ a hidden Markov model (HMM)  
59 that determines which assembly of reference haplotype chunks represents the target best. Mostly,  
60 the Li and Stephen model of linkage disequilibrium (LD)<sup>6</sup> is at the core of this HMM. This model  
61 describes LD in terms of the subjacent recombination rates. In particular, it estimates the probability  
62 of observing a chromosome (or haplotype) given the already sampled haplotypes from a population  
63 by considering the new haplotype as a copy of different parts of the sampled haplotypes while  
64 allowing mutations to arise. The transition rate between copying haplotypes is proportional to the  
65 recombination rate and it decreases with the number of available haplotypes to copy from.

66

67 SNP-array imputation is applied when genomes are genotyped at a subset of variant sites<sup>7</sup>. SNP-  
68 array imputation of modern DNA is often implemented to increase required sample sizes for  
69 genome wide association studies (GWAS), so as to avoid the still high whole-genome sequencing  
70 (WGS) costs<sup>8</sup>. It is also possible to impute low-coverage genomes whose genotypes cannot be  
71 directly determined with certainty, in which case genotype uncertainty is captured by likelihoods,  
72 instead of hard calls<sup>9-14</sup>. One can make use of this second type of methods to impute low-coverage  
73 ancient genomes. Present-day genotypes have been imputed with increasing accuracy due to  
74 improved imputation methods on the one hand, and increased reference panel size and diversity on  
75 the other hand, such as the Haplotype Reference Consortium (HRC)<sup>15</sup>, the 1000 Genomes Project<sup>16</sup>  
76 and TOPMed<sup>17</sup>. These advances have also been exploited by some (e.g., Martiniano et al., 2017<sup>18</sup>;

77 Haber et al., 2020<sup>19</sup>; Saupe et al., 2021<sup>20</sup>; Clemente et al., 2021<sup>21</sup>, Cox et al., 2022<sup>22</sup>; Allentoft et al.,  
78 2022<sup>23</sup>) to impute low-coverage ancient genomes, using present-day haplotypes, assuming  
79 matching ancestry.

80

81 However, aDNA introduces extra challenges, including damage and potential contamination<sup>24</sup>, and it  
82 is not clear whether ancient individuals' ancestries are well captured by reference panels of present-  
83 day individuals. Moreover, a precise quantification of possible imputation biases and errors is  
84 lacking. Hui et al.<sup>25</sup> proposed a two-step imputation pipeline to be applied to ancient genomes. This  
85 pipeline first imputes based on genotype likelihoods using Beagle4.1<sup>10</sup>, and then removes sites  
86 based on their maximum genotype probability (GP), a measure of how likely each possible  
87 genotype at a site is to be true after imputation. The resulting genotype calls are again imputed with  
88 Beagle5<sup>26</sup>, followed by a final GP filtering step. When compared to the first imputation step alone,  
89 this pipeline yielded larger proportions of heterozygous sites that pass the specified GP threshold.  
90 Nonetheless, a single downsampled ancient European genome was used to validate these results.  
91 Another recent study<sup>27</sup> assessed the imputation of ancient genomes performance by downsampling  
92 (0.1-2.0x) and imputing genomes from five high-coverage ancient Europeans using Beagle4.0<sup>28</sup> and  
93 various reference panel and sample size configurations. The authors measured genotype  
94 concordance, bias towards the reference panel and compared projections of the high-coverage,  
95 low-coverage and imputed 1x data onto principal component analysis (PCA) of present-day data.  
96 Imputation accuracy improved when i) using all populations in the 1000 Genomes reference panel  
97 instead of restricting to European genotypes alone and ii) the ancient genomes were imputed  
98 simultaneously. They found no bias increase towards the most common reference panel allele for  
99 ancient genome coverages as low as 0.75x.

100

101 These two studies<sup>25,27</sup> suggest that aDNA imputation performs well under specific conditions.  
102 However, in their assessment of imputation accuracy they used a rather limited sample of ancient  
103 genomes (one<sup>25</sup> and five<sup>27</sup>) and of only European descent. Furthermore, more accurate and

104 efficient low-coverage imputation methods are available, e.g., GLIMPSE<sup>12</sup>, than the methods they  
105 tested, i.e., Beagle4.0 and 4.1. Here, we make use of 43 ancient genomes, including an ancient trio  
106 and 42 high-coverage (>10x) genomes, from four different continents and different time spans to  
107 assess i) imputation accuracy of low-coverage ancient genomes and ii) how imputation affects  
108 downstream analyses. To this end, we downsampled to low coverage this diverse dataset of ancient  
109 genomes, which allowed us to quantify imputation performance across different ancestries, unlike,  
110 to our knowledge, any other previous study. We imputed the downsampled ancient genomes with  
111 GLIMPSE<sup>12</sup>, a state-of-the-art imputation and phasing tool that was shown to accurately impute low-  
112 coverage present-day genomes, having 1000 Genomes<sup>16</sup> as a reference panel. In the next sections,  
113 we show how imputation accuracy varies with depth of coverage, substitution type, i.e., transitions  
114 vs. transversions, imputation methods, ancestry, and post-imputation filtering. To address our  
115 second goal, we assess the effects of imputation not only on PCA, but also on genetic clustering  
116 and ROH analyses.

## 117 Results

118 The approach we followed in this study is schematically described in **Figure 1A**. We generated two  
119 datasets: imputed genotypes from downsampled genomes and corresponding validation genotypes  
120 called from the high-coverage ancient genomes, that we used as the ground truth. We started by  
121 sampling fractions of the sequencing reads from the 43 ancient genomes to obtain genomes with  
122 average depths of coverage between 0.1x and 2.0x. Then, using bcftools<sup>29</sup> (on the choice of  
123 genotype caller prior to imputation in **Supplementary Section 1**), we generated genotype  
124 likelihoods at biallelic sites of the 1000 Genomes phase 3 v5 data<sup>16</sup> phased with TOPMed<sup>17</sup>, the  
125 imputation reference panel, including all transition sites, in contrast to other studies<sup>27</sup>. We then  
126 imputed the data with GLIMPSE with the different steps described in the methods section. Lastly,  
127 we called genotypes for the high-coverage genomes and filtered out low-quality calls (methods and  
128 **Supplementary Section 2**), thus reducing the deamination impact. Finally, we assessed imputation  
129 performance and compared the downstream analyses results obtained with high-coverage and  
130 imputed genotypes.

131 Three out of the 43 ancient genomes in this study constitute a trio (mother, father and son) that was  
132 recently re-sequenced and is not yet fully public<sup>23,30</sup>, in contrast to the remaining 40 genomes. This  
133 dataset of 43 ancient genomes is a diverse dataset in regard to their sequencing/study, as well as  
134 epoch and continent the ancient individuals lived in, with about half of the individuals being from  
135 Europe and the other half from Africa, America and Asia (**Figure 1B**). Information concerning  
136 location and age of remains, and genome coverage is included in **Table S1**.

### 137 **1. Accuracy of low-coverage ancient DNA imputation**

138 We started by examining how imputation quality changes with average depth of coverage, and  
139 whether transversions are imputed more accurately than transitions, since the latter are affected by  
140 *postmortem* DNA deamination, i.e., C-to-T substitutions, which might wrongly increase the number  
141 of called heterozygous sites. We further compared imputation performance using two different state-  
142 of-the-art imputation methods, GLIMPSE and Beagle4.1<sup>10</sup>, where the latter is a widely used  
143 imputation method and was applied in Hui et al<sup>25</sup>. For that, we calculated imputation accuracy,  $r^2$ ,  
144 that is, the squared Pearson correlation between genotype dosage in the aggregate of the 42 high-  
145 coverage and imputed datasets, as a function of minor allele frequency (MAF) as determined from  
146 the 1000 Genomes reference panel.

### 147 **Ancient and present-day DNA imputation accuracies are comparable**

148 We found that imputation accuracy of ancient genomes was similar to the accuracy reported for  
149 present-day genomes when using the same imputation method<sup>12</sup>. Accuracy was higher for common  
150 variants (MAF $\geq$ 5%) (**Figure 2A**), as rare variants are more challenging to impute<sup>8,31</sup>. Imputation  
151 accuracy was also higher for genomes with higher coverage, as these have more data. In particular,  
152 for depths equal and greater than 0.75x, we obtained  $r^2 > 0.90$  at sites with MAF $>$ 2%, and  $r^2 > 0.70$   
153 and  $r^2 > 0.95$  for rare ( $0.1\% < \text{MAF} \leq 1\%$ ) and common variants (MAF $\geq$ 10%), respectively. We then  
154 found that GLIMPSE outperformed Beagle4.1 for 1x ancient genomes, particularly at rare variants  
155 (**Figure S3**), similarly to the case of present-day genomes<sup>12</sup>. Finally, we did not observe substantial  
156 differences in accuracy between imputed transversion and transition sites (**Figure S3**).

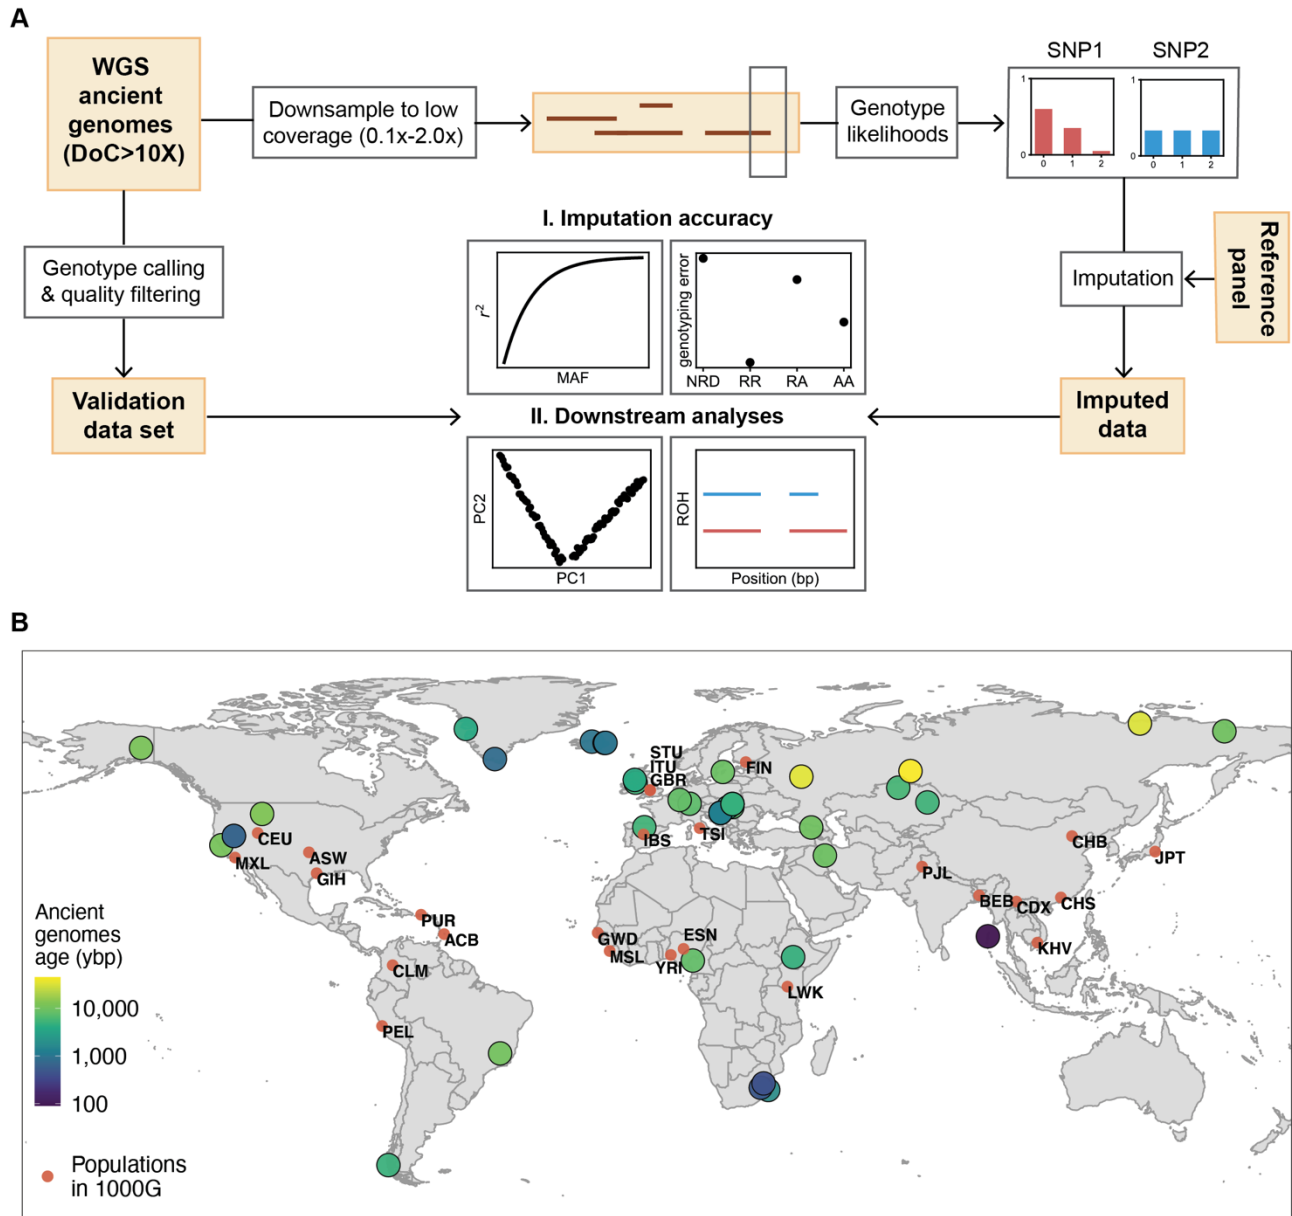

157

158 Figure 1: Overview of the procedure we followed (A), and geographical origin and age in years

159 before present (ybp) of the 43 individual samples used in this study as well as the different

160 populations represented in the 1000 Genomes reference panel (B).

161

162 Fixing depth of coverage at 1x, we evaluated how imputation performs across the 42 high-coverage

163 genomes of different ancestries and times. In addition to imputation accuracy as a function of MAF,

164 we quantified genotyping error rates for homozygous reference and alternative allele and

165 heterozygous sites. We also report the non-reference discordance (NRD), that is, the ratio of the

166 number of incorrectly imputed sites and the total number of imputed sites, excluding correctly  
167 imputed homozygous reference allele sites.

### 168 **Imputation error rates below 5% for most non-African 1x genomes**

169 The imputation of European, Western, and most Native American genomes yielded similar accuracy  
170 curves starting with lower values for rare variants ( $0.5 < r^2 \leq 0.9$ ) and converging to  $r^2 \geq 0.90$  from  
171  $MAF \geq 2\%$  (**Figure 2A**). The African ancient genomes were the least accurately imputed with only  
172 two out of five imputed genomes reaching  $r^2 > 0.90$ , and error rates as high as 18% at heterozygous  
173 sites, the most challenging to impute, and NRD between 4% and 29% (**Figure 2B**). In contrast,  
174 most non-African imputed genomes yielded NRD rates below 5%. This difference in imputation  
175 performance is likely due to lack of representation of the different African populations in the  
176 reference panel. Although the 1000 Genomes reference panel contains individuals of African origin,  
177 mostly from West Africa (Mende Sierra Leone (MSL), Gambian Mandinka (GWD), Esan Nigeria  
178 (ESN), Yoruba (YRI) and Luhya Kenya (LWK)), the genetic diversity in Africa<sup>32</sup> is not well  
179 represented in this panel. Therefore, reference populations from West Africa might not represent  
180 populations in Southern Africa<sup>33</sup> for imputation purposes, as in the case of baa01<sup>34</sup>, the most poorly  
181 imputed ancient genome. Conversely, European ancient individuals are better represented in the  
182 reference panel. And yet, Native American genomes were also accurately imputed, even though the  
183 populations in the reference panel show different admixture moieties, ranging from low (e.g., Puerto  
184 Rican (PUR)) to high Native American (e.g., Peruvian (PEL))<sup>16</sup> admixture proportions. This suggests  
185 that having haplotypes in the reference panel that match the ancestry of the target haplotypes is  
186 fundamental to achieve high imputation accuracy, even if these reference haplotypes originate from  
187 admixed individuals.

### 188 **Validating imputation and phasing accuracy on an ancient trio**

189 The availability of an ancient trio (mother, father, son) allowed us to use an orthogonal approach  
190 based on Mendel's rules of inheritance to measure imputation and phasing quality. This trio was  
191 sampled in a Late Neolithic mass burial at Koszyce<sup>23,30</sup> and was re-sequenced in the context of the



192 study of Allentoft et al.<sup>23</sup> resulting in genome coverages of 27.5x (mother, RISE1159), 18.9x (father,  
193 RISE1168), 5.4x (son, RISE1160). In this analysis, imputation errors corresponded to sites where  
194 parental and offspring genotypes disagreed with Mendel transmission rules. Here, we excluded  
195 sites that are homozygous for the reference allele in the three genomes as these positions are  
196 easier to impute. We estimated phasing accuracy in terms of switch error rate, that is assessed for  
197 every two consecutive heterozygous sites by verifying if the alleles for the two sites are located on  
198 the correct haplotypes following the expected configuration from the trio. Mendel error rates ranged  
199 from 1.3% at 4x to 12.2% at 0.1x (**Figure 3A**). For 1x data, in particular, Mendel error rates were  
200 between 1.5% and 2.9% across the 22 autosomes. These error rates agree with previously  
201 estimated imputation errors (**Figure 2B**). Switch error rates varied between 1.6% at 4.0x and 8.2%  
202 at 0.1x, with errors for 1x data in the range 1.6%-3.0% (**Figure 3B**). For present-day genomes and  
203 small sample sizes, switch error rates are typically between 1% and 5%<sup>35-37</sup>, and we achieved  
204 similar accuracy when imputing and phasing the genomes downsampled to a minimum coverage of  
205 0.25x.

### 206 **Genotype probability filtering: a trade-off between more accurate calls and alternative allele** 207 **sites loss**

208 After imputation, we can filter based on the maximum of genotype probabilities (GP) for a site. GP is  
209 a measure of how likely each genotype is to be true and takes values between 0 and 1 that sum to 1  
210 across the possible genotypes. To determine which GP value we would use to filter the imputed  
211 data prior to downstream analyses, we applied GP filters starting at 0.70 and up to 0.99 to four  
212 different imputed ancient genomes downsampled to 0.1x and 1.0x (RISE1168<sup>23,30</sup>, SIII<sup>38</sup>, Ust'-  
213 Ishim<sup>39</sup> and Mota<sup>40</sup>). We then quantified imputation accuracy and genotype discordance. We  
214 observed a greater boost in accuracy as the GP filter becomes stricter for 0.1x imputed data than for  
215 1x data (**Figure 4A**). In the case of 1x data, we obtained small improvements in accuracy for sites  
216 with MAF>5%. The exception was the individual sample Mota, where the gain in accuracy for a  
217 specific GP filter had similar magnitude across sites with different MAF values. This African genome  
218 yielded the second lowest imputation accuracy amongst the 42 ancient high-coverage genomes

219 downsampled and imputed in this study. We observed the same trends with genotype discordance  
220 between imputed and high-coverage genotypes (**Figure 4B**). Genotyping error rates were higher for  
221 0.1x than for 1x imputed genomes, for whom error rates remained below 5%, except for Mota.  
222 Increasing GP filtering values decreased these error rates in all instances. Then, we looked at how  
223 GP filtering affects the number of correctly imputed heterozygous sites (**Figure 4C**). The proportion  
224 of lost heterozygous sites was much higher in the case of 0.1x data, explained by the lower  
225 imputation accuracy for this coverage. For 0.1x data, filtering out sites with  $GP < 0.70$  removed  
226 around 15% of correct heterozygous sites in the least. When  $GP \geq 0.99$ , only between 20% and 43%  
227 of correct heterozygous sites remained. In contrast, the imputed 1.0x genomes lost a small fraction  
228 of their heterozygous sites as stricter GP filters were applied. This fraction was smallest amongst  
229 the genomes of European ancestry (<8%, RISE1168 and SIII) and largest for Mota (22%), a  
230 reflection of how accurately these genomes were imputed. In the end, a trade-off must be made  
231 between loss of heterozygous sites and imputation accuracy. Based on these results, we chose to  
232 remove sites with  $MAF < 5\%$  and set to missing imputed sites with  $GP < 0.80$ , for most of the  
233 downstream analyses, thus keeping most heterozygous sites for 0.1x data while controlling for  
234 imputation accuracy.

235

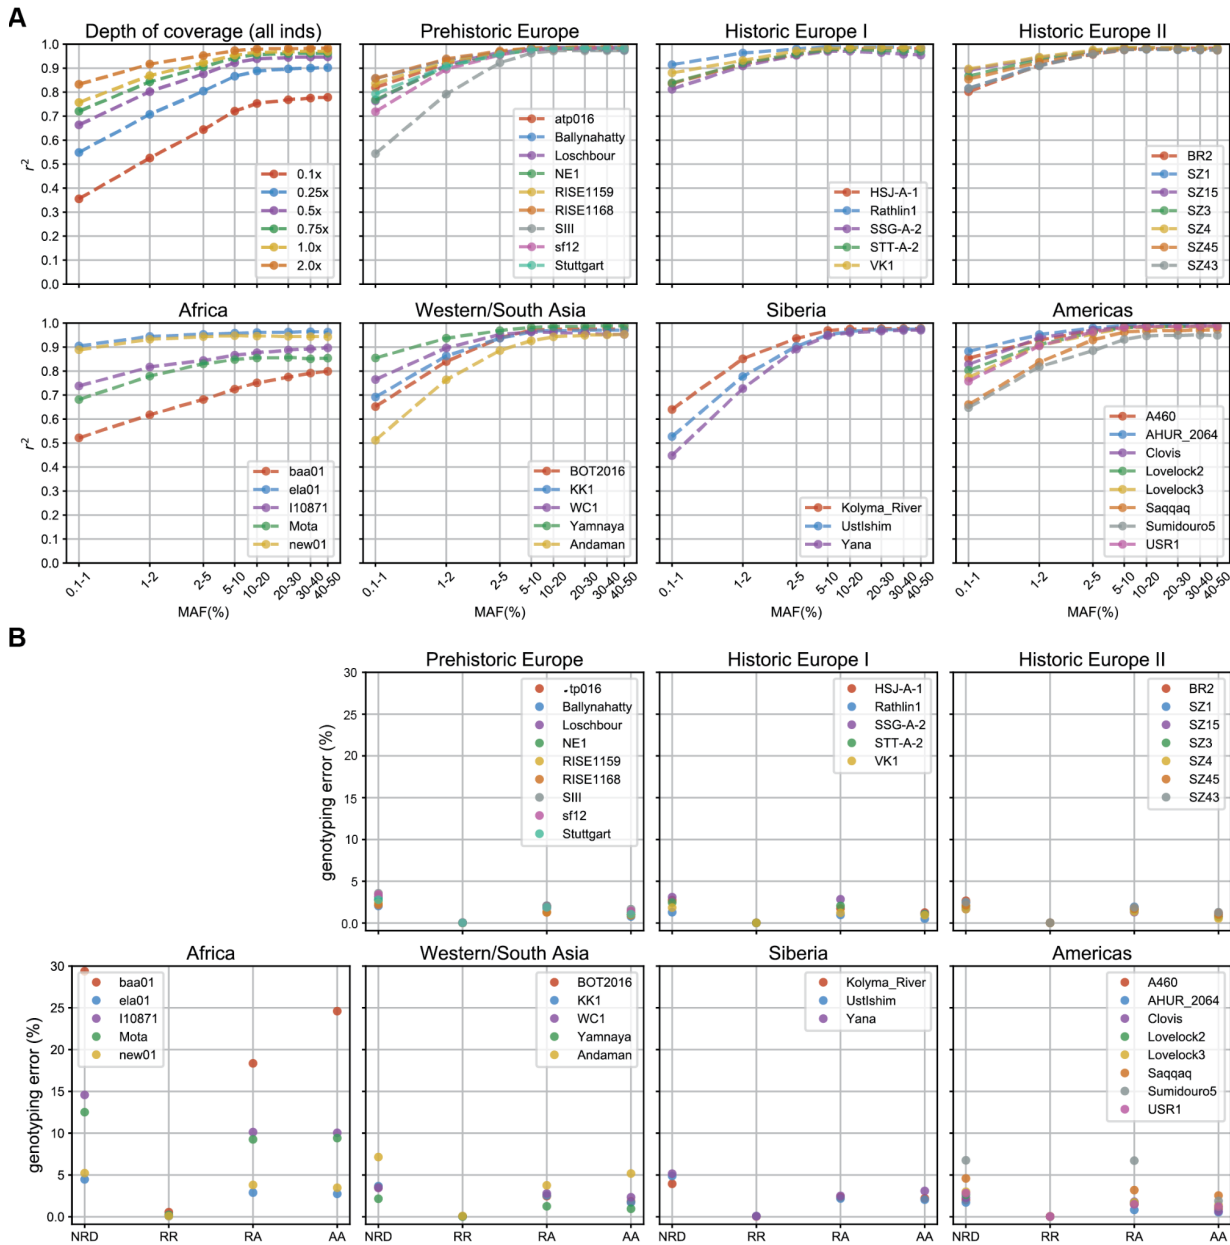

236

237

238

239

240

241

242

243

244

Figure 2: Imputation quality assessment: A) imputation accuracy ( $r^2$ ) as a function of minor allele frequency (MAF) for the 42 high-coverage genomes together downsampled to different depths of coverage (top left) and for individual 1x genomes (remaining plots); B) genotype discordance between individual imputed (1x) and high-coverage genomes for homozygous reference allele (RR), heterozygous (RA) and homozygous alternative allele (AA) sites, as well as the resulting non-reference discordance. Depending on ancestry, MAF was specified from the reference populations expected to be closer to the individual in question, whenever possible, as listed in **Table S1**. Individuals were put in categories that roughly reflect their place of origin and/or time.

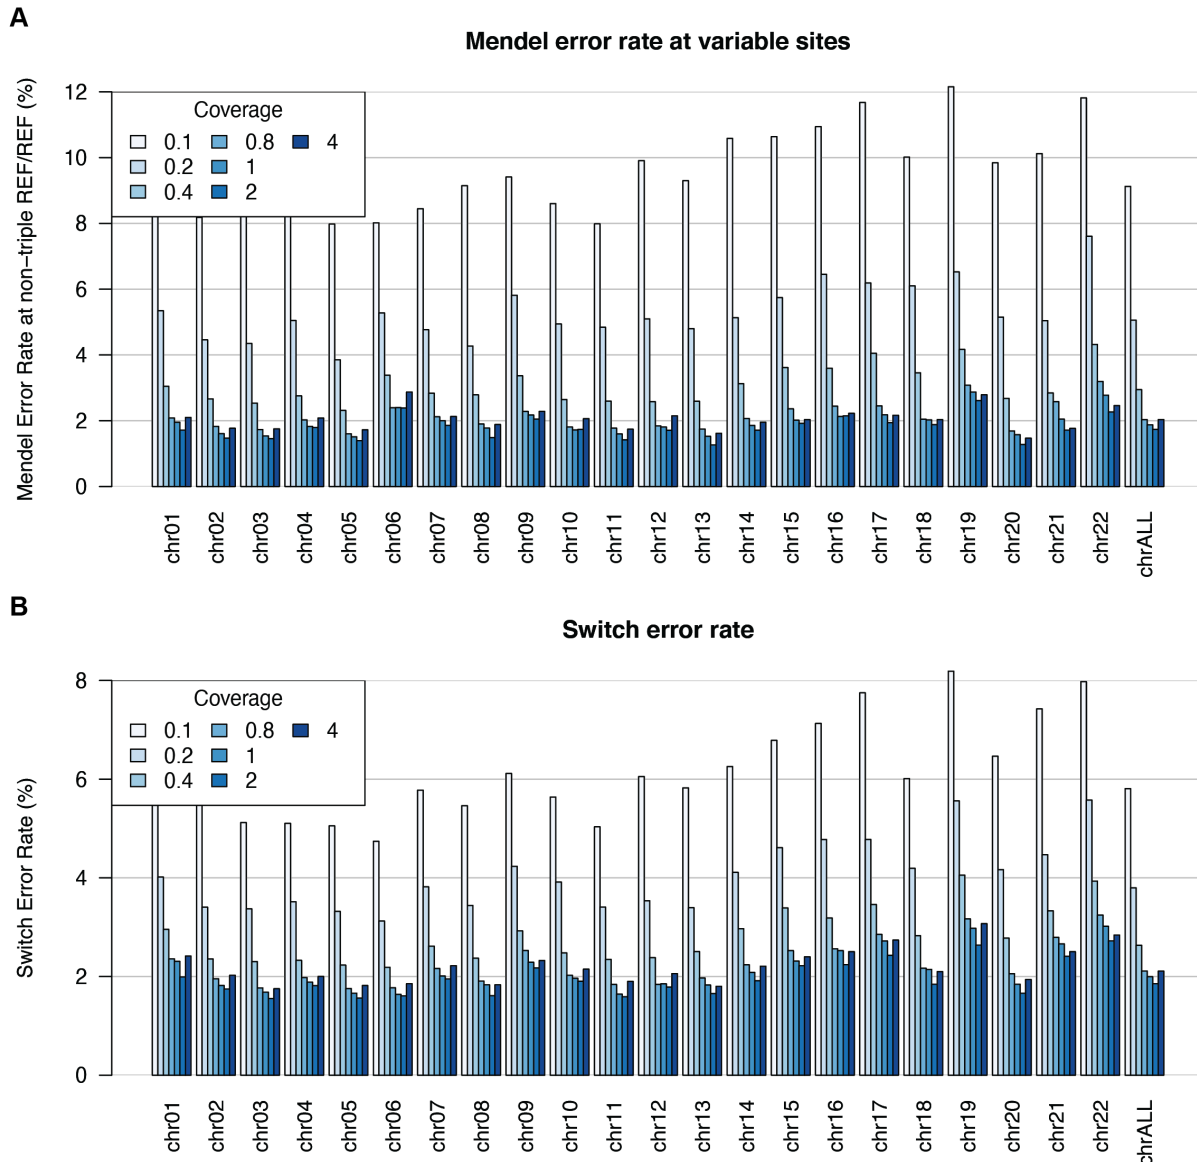

245

246 Figure 3: Imputation and phasing accuracy for the Koszyce trio: A) Mendel error rate across the 22  
247 autosomes is counted when the parental and offspring genotypes violate Mendel transmission rules,  
248 excluding sites at which all three non-imputed genomes are REF/REF; B) switch error rates  
249 averaged over the three genomes. A switch error is counted between two consecutive heterozygous  
250 genotypes when the reported haplotypes are not consistent with those derived from the trio.

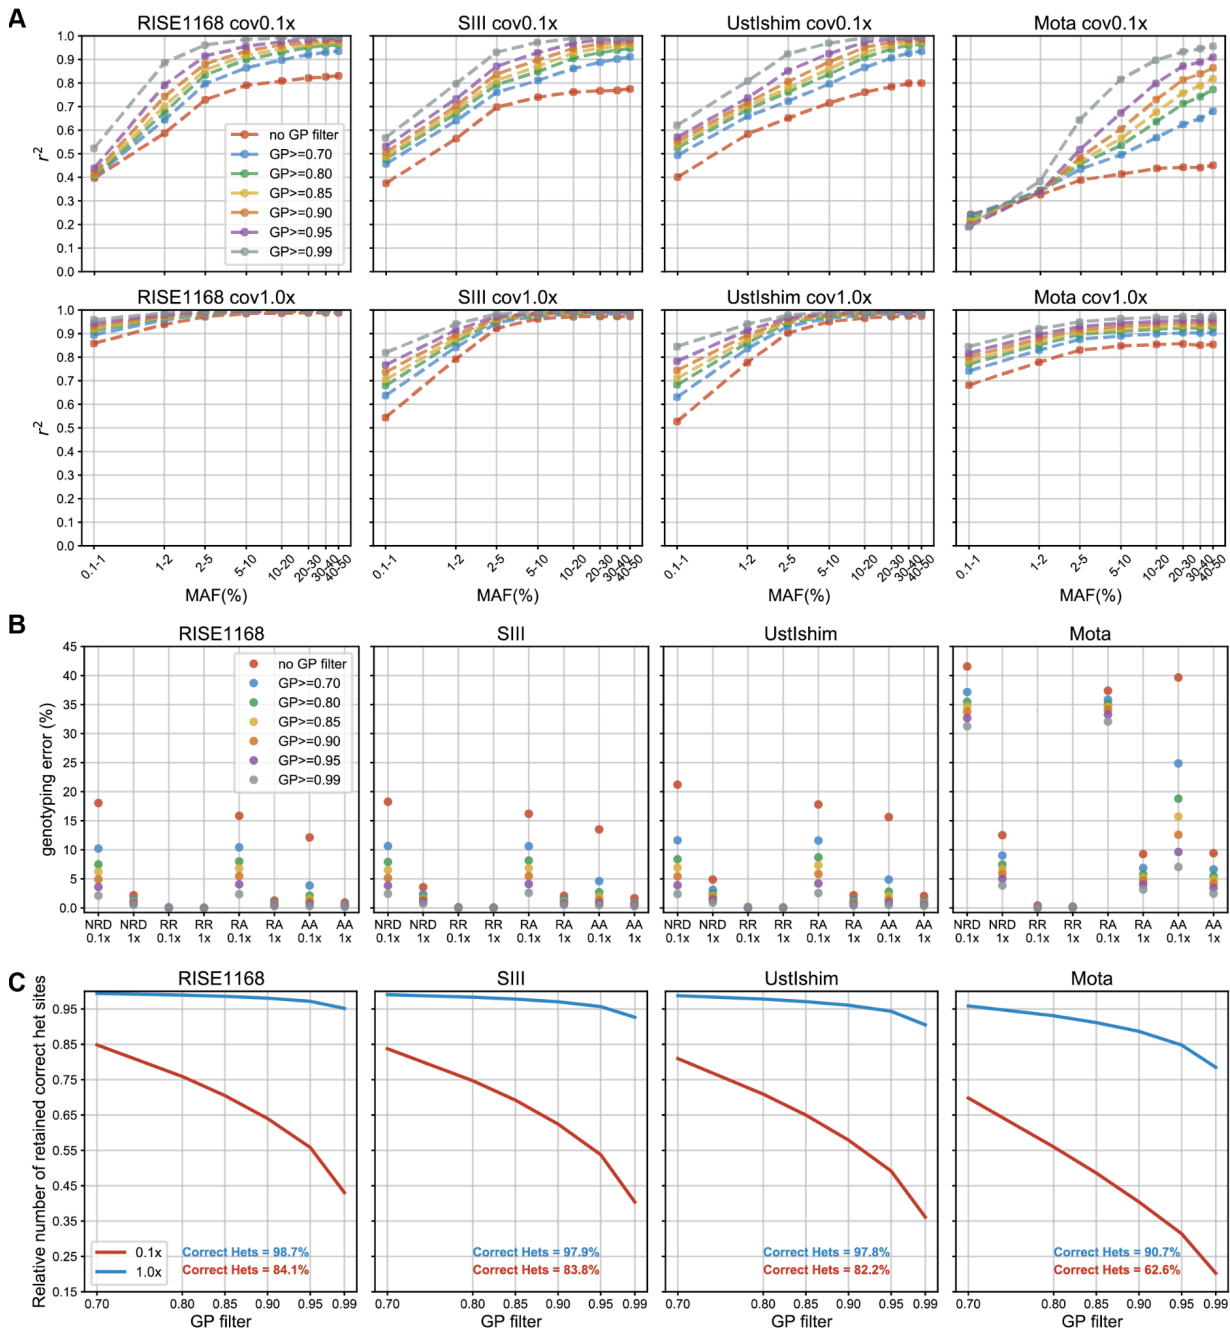

251

252 Figure 4: Effects of applying different thresholds when filtering for GP in the case of four imputed 1x  
 253 ancient genomes (RISE1168<sup>23,30</sup>, SIII<sup>38</sup>, Ust'-Ishim<sup>39</sup> and Mota<sup>40</sup>) on A) imputation accuracy, B)  
 254 genotype discordance between imputed and non-imputed genomes for homozygous reference  
 255 allele (RR), heterozygous (RA) and homozygous alternative allele (AA) sites, and also the non-  
 256 reference discordance (NRD), C) proportion of correctly imputed heterozygous sites retained for  
 257 0.1x and 1.0x data for each of the four genomes. The percentage of correctly imputed heterozygous  
 258 sites for 0.1x and 1.0x before GP filtering are represented in red and blue, respectively, in panel C.

## 259        **2. Imputation effect on downstream analyses**

260        In order to detect and quantify potential bias introduced by imputation, we compared the results of  
261        downstream analyses, namely, principal component analysis (PCA) and genetic clustering  
262        analyses, performed with the high-coverage and imputed genomes, after filtering for MAF and GP  
263        (imputed data). These three methods are broadly used in population genetics to investigate  
264        population structure and demography. PCA is a dimension reduction technique that helps  
265        visualizing patterns of population structure. In the genetic clustering analyses, the ancestry of an  
266        individual is estimated as the sum of K different clusters determined from the data in an  
267        unsupervised fashion. We further explore the potential of imputing low-coverage ancient genomes  
268        by estimating runs of homozygosity (ROH), whose classical applications require diploid data. ROH  
269        segments are unbroken homozygous regions of the genome that contain information about past and  
270        recent breeding patterns<sup>41</sup>. ROH have been found in all populations, but their number and size vary,  
271        depending on demographic histories.

272  
273        For the PCA, we calculated the first ten principal components of the 1000G reference panel and  
274        projected both the high-coverage and corresponding imputed ancient genomes onto those. We  
275        have included both transition and transversion sites in this analysis.

### 276        **Imputation did not introduce significant bias in PCA for coverages of at least 0.5x**

277        Both the imputed 1x and high-coverage ancient genomes were in the expected continental groups  
278        as defined by present-day individuals in the two first principal components (**Figure 5A**). They also  
279        tended to colocalize, which was particularly the case for ancient individuals clustering with present-  
280        day Europeans, suggesting limited bias is introduced by imputation in the PCA results. To further  
281        verify whether imputation introduced bias in this analysis, we took the difference in coordinates  
282        between validation and corresponding imputed 1x genomes for each principal component. As  
283        shown in **Figure 5B**, the normalized differences between the two datasets were small and did not  
284        deviate significantly from 0 (t-test p-values > 0.01). Additionally, we found that only genomes with

285 coverage as low as 0.1x and 0.25x show some significant deviation from 0 (**Figure 5C**) for some  
286 principal components, however, the imputed data were still placed in the expected continental  
287 clusters in the PCA space (**Figure S4**). This is particularly clear for European ancient genomes.  
288 These results show that the differences between imputed and high-coverage coordinates tended to  
289 be centered on 0 for the first principal components, in particular for genomes with coverage above  
290 0.25x, suggesting that imputation did not introduce a significant bias to the PCA.

291

### 292 **No ancestry bias in genetic clustering analyses of imputed European ( $\geq 0.5x$ ) genomes**

293 For the genetic clustering analyses, we focused on the European genomes. It is well established  
294 that the genetic diversity of present-day Europeans can be modeled with three ancestral  
295 populations: western hunter-gatherers, early European farmers and Steppe pastoralists<sup>42</sup>. Ancient  
296 European individual samples tend to exhibit different distributions of these three ancestries across  
297 time and space. We asked whether imputation of European ancient genomes artificially increases  
298 the amount of inferred Steppe-like ancestry for these individuals, since most present-day European  
299 individuals have Steppe ancestry, including the European populations in the 1000 Genomes  
300 reference panel. For instance, we assessed whether the Steppe-like component increases in  
301 imputed western hunter-gatherer genomes like Loschbour<sup>42</sup>. To this aim, we performed unsupervised  
302 admixture analyses with the software ADMIXTURE<sup>43</sup>, including transitions and transversions. We  
303 used as a reference panel the genetic data of 61 ancient individuals present in the 1240K dataset<sup>44</sup>,  
304 including nine western hunter-gatherers, 26 Anatolian farmers and 26 individuals of Steppe ancestry  
305 (see **Table S2**). We estimated ancestry proportions for the imputed and validation data separately  
306 varying the number of clusters (K) between two and five. For K=2, 4 and 5, we observe qualitatively  
307 similar results for imputed and high-coverage data (see **Supplementary Section 6**). Here we show  
308 the results obtained with K=3 (**Figure 6A**), as these clusters seemingly capture the three  
309 aforementioned ancestries. The admixture proportions are qualitatively similar between the high-  
310 coverage ancient genomes and the corresponding imputed ones, and, in the particular case of  
311 Loschbour, the only western hunter-gatherer imputed in this study, we estimated 100% western

312 hunter-gatherer-like ancestry with both imputed 1x and high-coverage data (**Figure 6B**). In order to  
313 compare the admixture results across imputed data with different depths of coverage, we took the  
314 difference between ancestry proportions estimated for the validation and imputed genomes for each  
315 ancestry component and each coverage (**Figure 6C**). We observed larger differences with imputed  
316 0.1x and 0.25x data. For the remaining depths of coverage, the small differences distributed around  
317 0 show no indication that imputation introduced any substantial bias towards a particular ancestry in  
318 this analysis.

### 319 **ROH estimated in imputed and high-coverage genomes overlap**

320 Then, we first quantified ROH using transversions only to minimize the aDNA damage impact on the  
321 validation estimates. We examined how well the imputed and the validation ROH overlapped in  
322 chromosome 10 for each depth of coverage and for four different individuals, namely Ust'-Ishim<sup>39</sup>  
323 (Siberia), Rathlin<sup>145</sup> (Europe), A460<sup>46</sup> (Americas) and Mota<sup>40</sup> (Africa) (**Figure 7A**). The imputed 0.1x  
324 data had an excess of ROH when compared to the high-coverage data. This likely results from i)  
325 reduced imputation accuracy and ii) removal of a large proportion of heterozygous sites when  
326 applying post-imputation filters (**Figure 4C**). As the depth of coverage increased, the number of  
327 falsely identified ROH tended to decrease, while most validation ROH were also found amongst the  
328 imputation ROH. We then compared the total ROH lengths, stratified by segment size, measured in  
329 the imputed data with the validation data for the different depths of coverage and the same four  
330 individuals (**Figure 7B**). Again, we found the largest discrepancies between validation and imputed  
331 0.1x data, with an excess of ROH segments, particularly of the shortest kind (0.5-1.0 Mb). For  
332 coverages above 0.1x, the total ROH lengths in the imputed genomes were close to the validation  
333 ROH. Lastly, restricting to imputed 1x data, we contrasted the total length of small ROH (<1.6 Mb)  
334 with the total length of longer ROH ( $\geq 1.6$  Mb) obtained with transversions only (**Figure 7C**) and all  
335 sites (**Figure 7D**). When using transversions only, the total ROH lengths estimated for high-  
336 coverage and corresponding imputed 1x genomes were similar, particularly for the European  
337 genomes. Furthermore, the ROH trends for the ancient individuals mostly agreed with documented



338 ROH for their present-day counterparts, with Africans having the smallest total ROH lengths and  
339 Native Americans the longest<sup>41</sup>.

#### 340 **Imputation seems to correct damage in ROH estimates in the case of Sumidouro5**

341 When we added transitions to estimate ROH, the distance between imputed and validation ROH  
342 increased for some genomes (**Figure 7D**). In the case of the ancient Native American  
343 Sumidouro5<sup>46</sup>, this distance dramatically increased. The high-coverage estimate for Sumidouro5  
344 was now located between the African and European values, but the imputed estimate remained  
345 close to both the high-coverage and imputed values obtained with transversions only. For this  
346 genome, we found major differences between high-coverage ROH sizes obtained with transversions  
347 only and all sites, whereas the corresponding imputed ROH were highly consistent (**Figure S12**).  
348 This indicates that the discordance between validation and imputed ROH, when transitions were  
349 introduced, originated from the validation data. Indeed, Sumidouro5 is a very damaged genome  
350 (40% deamination rate)<sup>46</sup>, which likely led to an excess of heterozygous calls in the high-coverage  
351 data, despite the quality filtering (see **Supplementary Section 2**).

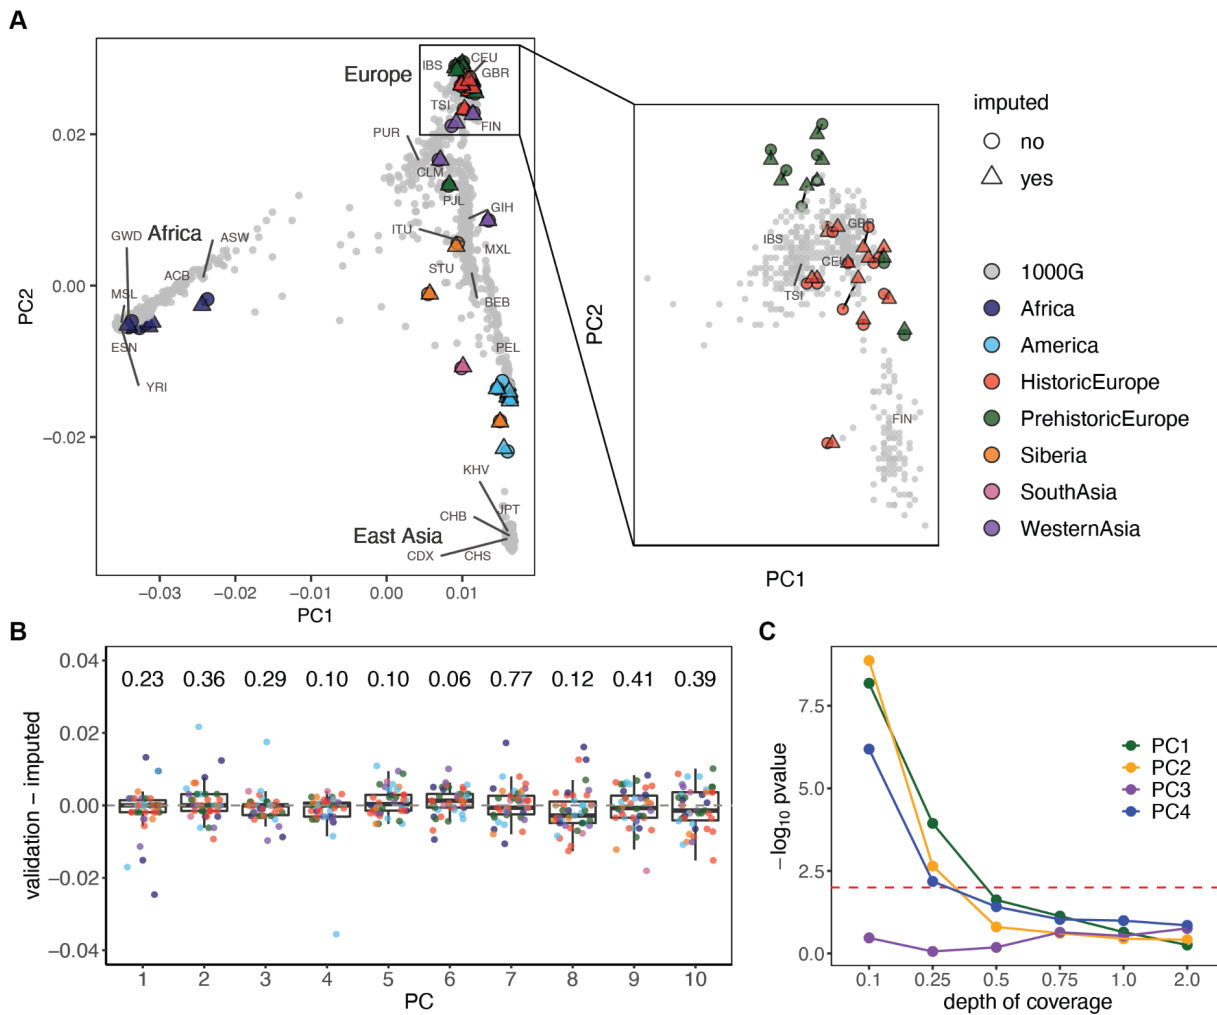

352

353 Figure 5: Principal component analysis (PCA) of imputed and high-coverage ancient genetic data,  
 354 and present-day data in 1000 Genomes reference panel: A) projections for 1x imputed, high-  
 355 coverage and present-day data along the first two principal components, where 1000 Genomes  
 356 individuals are plotted in gray and population labels are shown in the average location of the  
 357 individuals from the same population, ancient individuals are colored by region and/or epoch, with  
 358 the high-coverage and imputed individuals represented by full circles and triangles, respectively; the  
 359 plot on the left contains the coordinates of the whole data set and the plot on the right shows the  
 360 coordinates of European modern individuals as well as of the European-labeled ancient individuals  
 361 that cluster with these; B) boxplots of the normalized differences in coordinates between validation  
 362 and corresponding 1x imputed genomes for the first 10 principal components and resulting p-values  
 363 from testing whether differences are significantly different from 0; individual data points are overlaid  
 364 and colored according to the region and/or epoch as in the previous plot; C)  $-\log_{10}$  p-values obtained

365 when testing whether differences between imputed and validation data are significantly different  
 366 across the six depths of coverage and for the first four principal components; the red dashed line  
 367 indicates a p-value of 0.01.

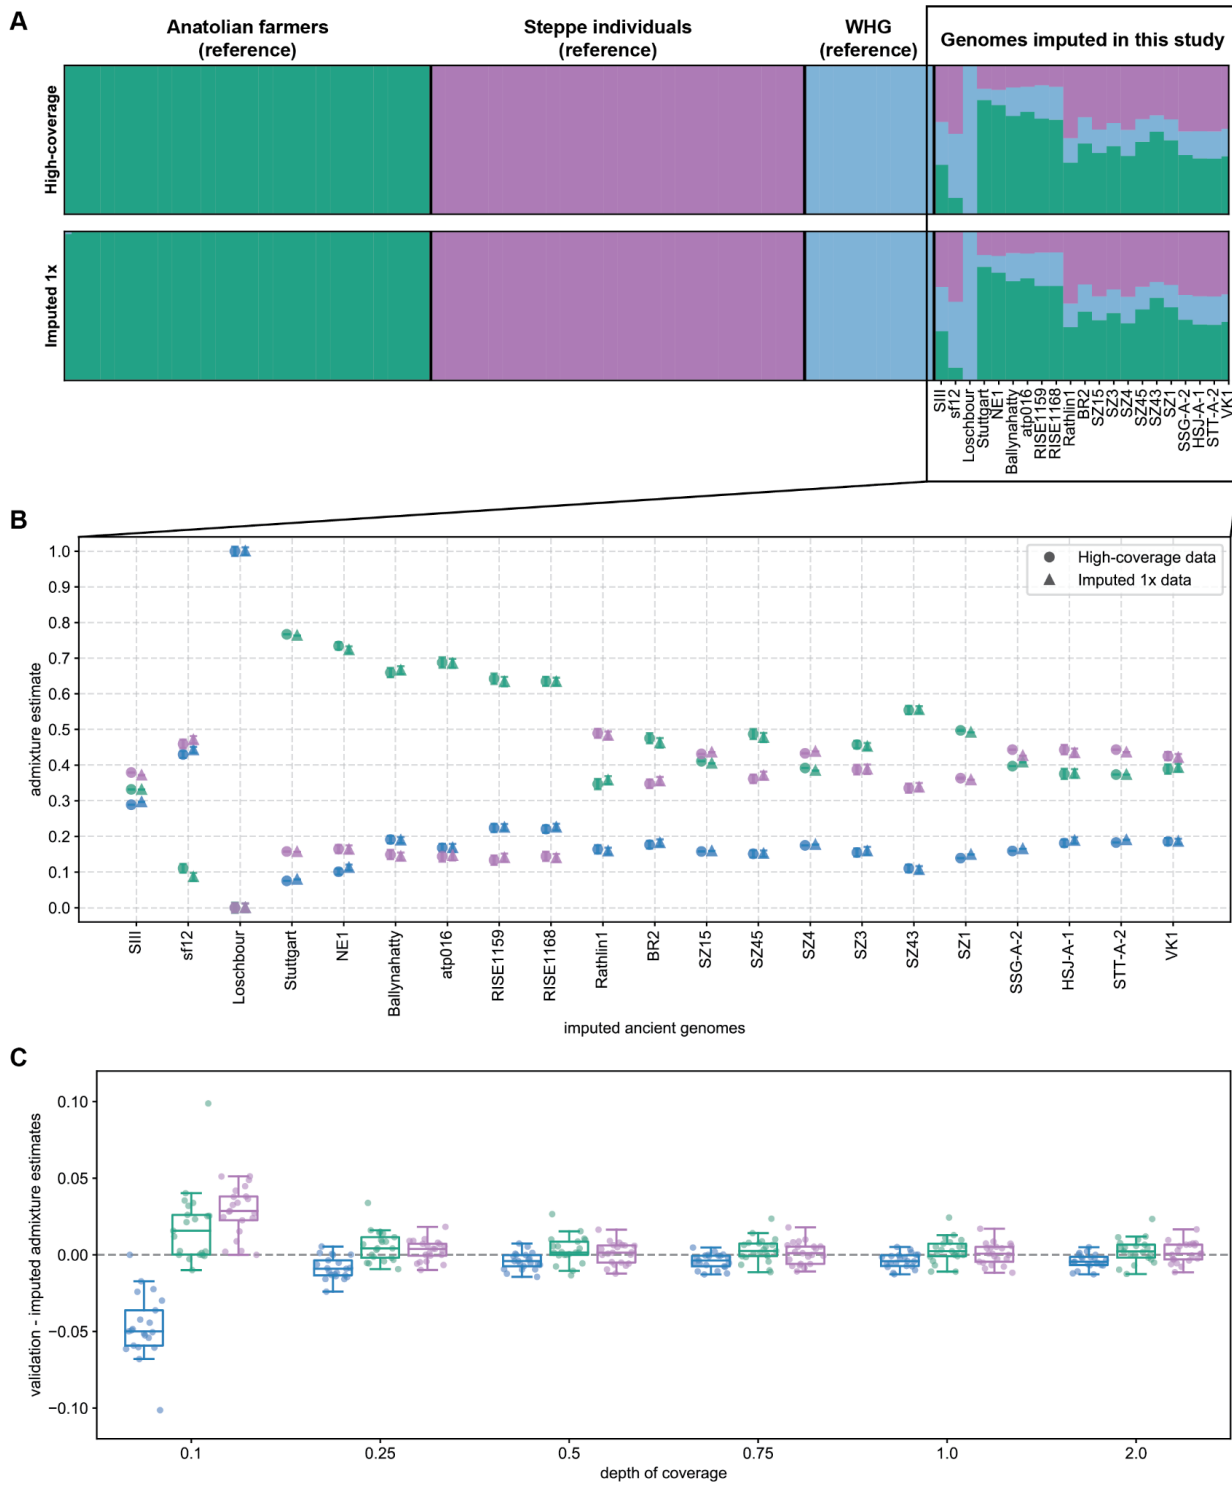

368

369 Figure 6: Unsupervised admixture analyses of European ancient individuals with three clustering  
370 populations: A) resulting admixture proportions and clusters for the reference and the 21 European  
371 individuals in this study, with validation results on top and imputed 1x below; B) admixture estimates  
372 for each of the three clusters obtained with imputed 1x (triangles) and validation (full circles) data for  
373 each of the 21 individuals, where error bars represent one standard error of the estimates; C)  
374 boxplots of the differences between the values of ancestry components obtained with the high-  
375 coverage and imputed data across all depths of coverage.

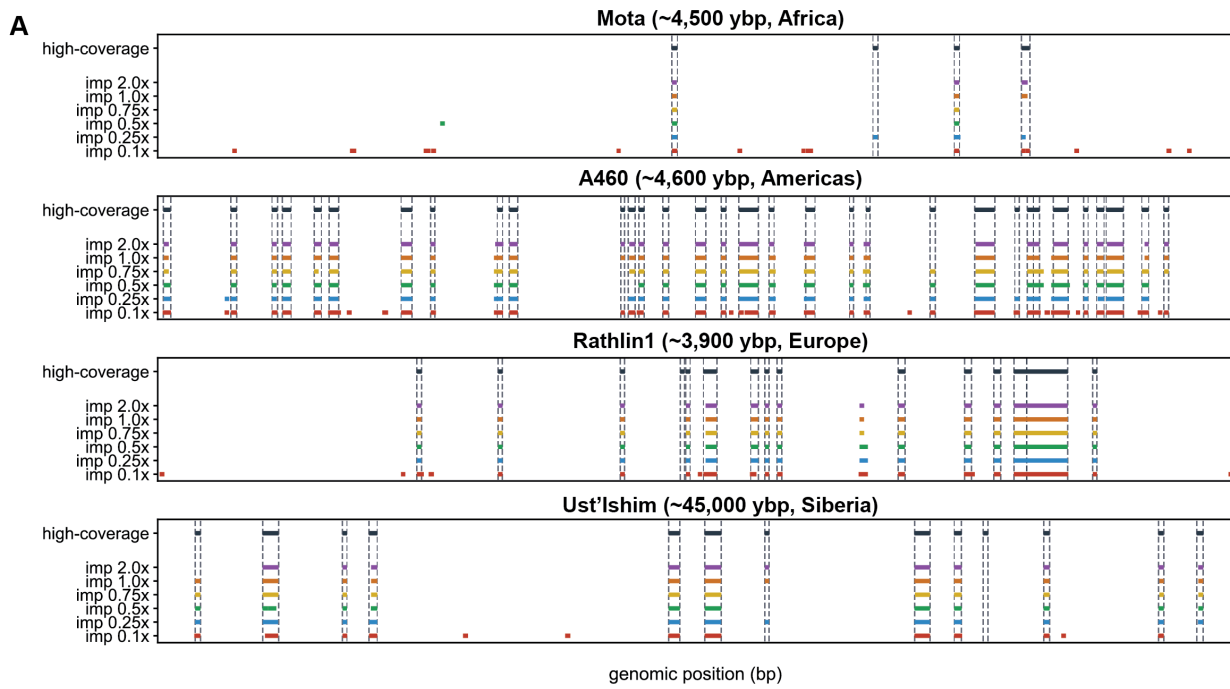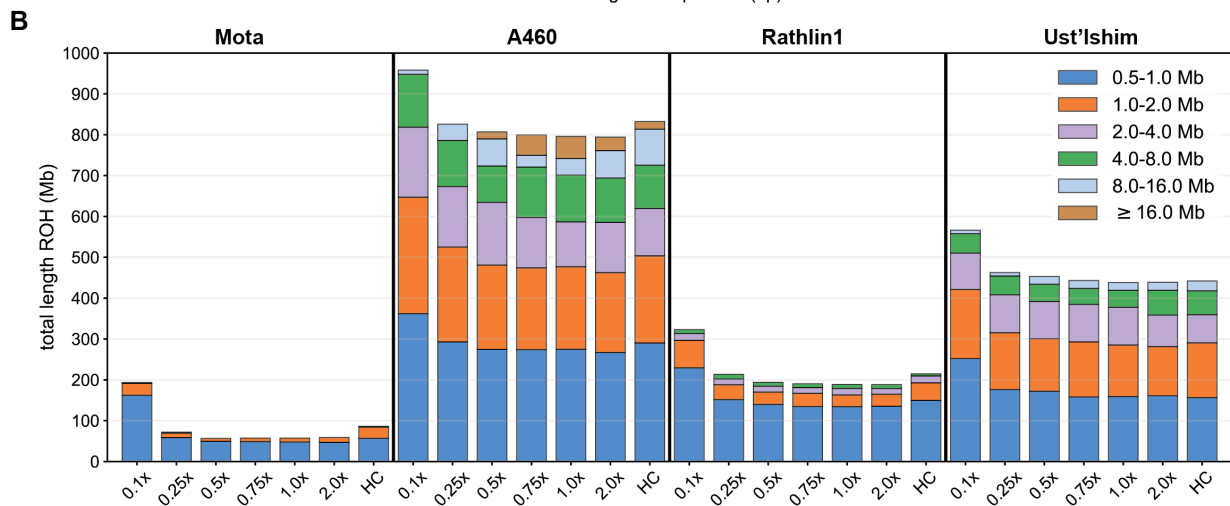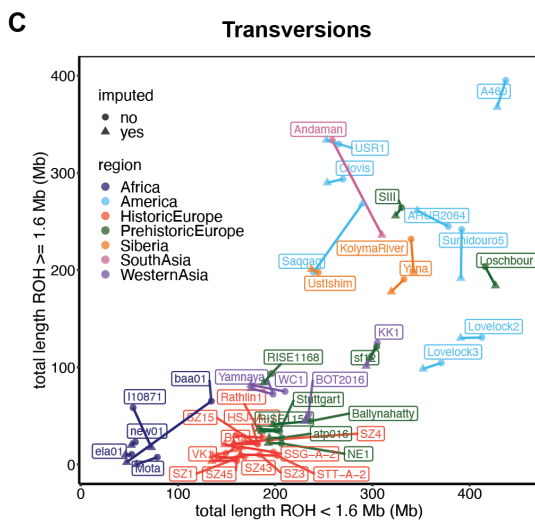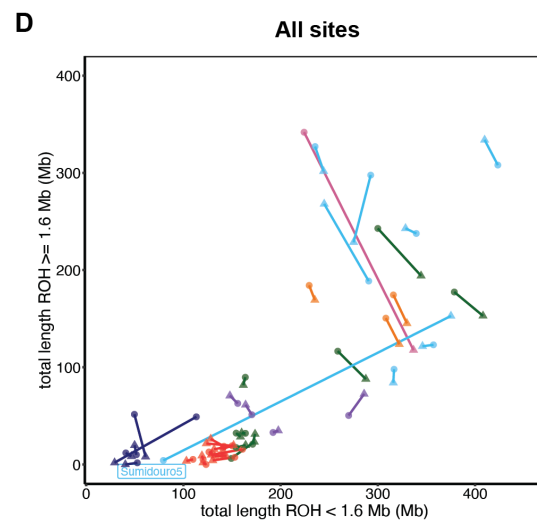

377 Figure 7: Runs of homozygosity (ROH) estimates for the high-coverage and corresponding imputed  
378 genomes: A) ROH locations in chromosome 10 found using transversions only with high-coverage  
379 and imputed genomes, in the case of four ancient individuals, namely, Mota<sup>40</sup> (~4,500 ybp (years  
380 before present), Africa), A460<sup>46</sup> (~4,600 ybp, Americas), Rathlin1<sup>45</sup> (~3,900 ybp, Europe), Ust'-  
381 Ishim<sup>39</sup> (~45,000 ybp, Siberia); B) total length of ROH discriminated by individual ROH length  
382 categories, estimated for imputed and high-coverage genomes (HC) using transversion sites for the  
383 four aforementioned individuals; C) total length of long ( $\geq 1.6$  Mb) vs. small ( $< 1.6$  Mb) ROH  
384 segments for validation (full circles) and 1x imputed (triangles) genomes using transversion sites  
385 only and (D) using transversions and transitions.

## 386 Discussion

387 Here we showed that low-coverage ancient genomes can be imputed with similar accuracy as  
388 modern genomes. In particular, we obtained accurate results at common variants, for coverages  
389 starting at 0.5x from MAF>5% (or at 0.75x from MAF>2%). However, this threshold is dependent on  
390 the ancient genomes' ancestry. We observed that how well populations are represented in the  
391 reference panel can have a profound impact on imputation accuracy, with genotyping errors at  
392 alternative allele sites above 5% and up to 25% among African 1x genomes. These populations are  
393 underrepresented in the reference panel, whereas European genomes are better represented, and  
394 their imputation resulted in low error rates. Most Native American ancient genomes were also  
395 accurately imputed, and there are no reference populations with 100% Native American ancestry,  
396 but only with mixed ancestry. This result has far-reaching implications for the potential of imputing  
397 ancient genomes, since it is not guaranteed that there will be a present-day population that directly  
398 descends from the population which the ancient individual originates from without having admixed.  
399 Our results suggest that using admixed reference populations that share recent ancestry with the  
400 target ancient genomes can be enough in order to attain accurate imputation.

401

402 For most genomes, we obtained similar results with high-coverage and imputed data with coverages  
403 as low as 0.5x for the downstream analyses we carried out, i.e., PCA, admixture clustering and  
404 ROH estimation. Imputation did not introduce major bias for the first principal components, nor did it  
405 considerably increase the proportion of any of the three main ancestry components found in  
406 Europeans. The similarity of validation and imputed ROH segments is worthy of note, since ROH  
407 estimation typically requires reliable knowledge of genotypes, which is only available for high-  
408 coverage genomes. This means that ROH estimation methods designed for diploid data can  
409 become possible with low-coverage ancient genomes after imputation.

410

411 Although we did not remove transition sites prior to imputation, we found that transversion and  
412 transition sites were imputed with comparable accuracy. In fact, when we compared ROH estimates  
413 performed with transversions and all sites, we observed that imputation corrected ROH in the case  
414 of Sumidouro5, with 40% C-to-T mismatch frequency at the end of the reads. Given this  
415 observation, imputation of ancient genomes has the potential of correcting genotypes that are  
416 affected by damage and other sources of error. It remains to assess whether we can accurately  
417 impute contaminated ancient genomes in such a way that contaminating sequences do not  
418 contribute to the final genotypes.

419

420 We did not explore numerous genotype and haplotype-based applications that can greatly benefit  
421 from imputation of low-coverage ancient genomes, such as temporal selection scans and local  
422 ancestry inference. Moreover, genotype imputation, in general, is expected to improve as more and  
423 larger reference datasets become available. The recent release of 200K whole-genome sequences  
424 in the UK Biobank<sup>47</sup>, which can be used as a reference panel for imputation, offers an opportunity to  
425 improve imputation performance in the case of low-coverage European genomes, including ancient  
426 genomes, especially at rare variants and lower depths of coverage. In the case of ancient DNA,  
427 when the target genome is not well represented by modern reference populations or when a boost  
428 in imputation accuracy is required, additional reference panels can be assembled with high-quality

429 ancient genomes of individuals with more closely shared ancestry. Furthermore, the number of  
430 sequenced ancient genomes has been growing exponentially and with no sign of slowing down.  
431 This means that more and more ancient genomes will be available with different ancestries and  
432 from different periods and with that comes the opportunity to expand existing reference panels with  
433 ancient genomes and to implement imputation in a more standardized way.

## 434 Methods

435 In this section, we describe the methods implementation, starting with imputation, that includes all  
436 the file processing, imputation using GLIMPSE and using Beagle4.1, then the three downstream  
437 applications (PCA, genetic clustering analyses and ROH) and finishing with the two reference data  
438 sets used in this study.

### 439 1. Imputation

#### 440 a. File processing prior to imputation

441 We downsampled high-coverage (10x-59x range) ancient genomes to coverages 0.1x, 0.25x, 0.5x,  
442 0.75x, 1.0x and 2.0x, using samtools<sup>29</sup> v1.10. Then, we computed genotype likelihoods for the  
443 downsampled and the original high-coverage genomes for variant sites present in the 1000  
444 Genomes phase 3 reference panel<sup>16</sup> phased with TOPMed<sup>17</sup> (see methods section 3.a).

445  
446 To generate the genotype calls and genotype likelihoods, we used bcftools<sup>29</sup> v1.10 and, as default,  
447 the command `bcftools mpileup` with parameters `-I -E -a 'FORMAT/DP' --ignore-RG`, followed by  
448 `bcftools call -Aim -C alleles`. To call genotypes from the high-coverage genomes, we have applied  
449 additional parameters for quality control (more details below).

450  
451 We also generated both genotype calls from the high-coverage genomes and genotype likelihoods  
452 for the downsampled data (1x) with ATLAS<sup>48</sup> v0.9.9 (see **Supplementary Section 1** and



453 **Supplementary Section 2**) using the MLE caller and the empirical post-mortem damage (PMD)  
454 pattern observed across reads, as described in <https://bitbucket.org/wegmannlab/atlas/wiki>. For  
455 sake of time, we skipped the first step, splitMerge, that separates single-end alignments by length  
456 and merges the mates of paired-end reads and requires specification of the different libraries  
457 contained in a bam file. It is often the case that an ancient genome is obtained from a mixture of  
458 paired-end and single-end libraries. We observed that this first step we skipped did not have much  
459 impact when the bam files only had single-end libraries, but the genotype calling was seemingly less  
460 accurate when there were paired-end libraries in the bam files. So, we do not report here results we  
461 obtained from ATLAS calls from ancient genomes that were sequenced from paired-end libraries.

462

463 To obtain a trimmed validation dataset (see **Supplementary Section 2**), we trimmed five base pairs  
464 at both ends of the reads using the command trimBam from the package bamutil<sup>49</sup> v1.0.14. Then,  
465 we called genotypes using bcftools v1.10, as previously described.

466

467 The final validation dataset was obtained by implementing the following filtering approach<sup>46</sup>: i)  
468 genotype calling with bcftools v1.10 with mapping and base quality filters of 30 and 20 ( $-q\ 30\ -Q\ 20$ ),  
469 respectively, and with the parameter  $-C\ 50$ , as recommended by the SAMtools developers for BWA  
470 mapped data to reduce mapping quality for reads with an excess of mismatches; ii) exclusion of the  
471 sites that are not in the 1000 Genomes accessible genome strict mask<sup>50</sup>; iii) removal of sites located  
472 in regions known to contain repeats (RepeatMask regions in UCSC Table Browser<sup>51</sup>,  
473 <http://genome.ucsc.edu/>); iv) filtering out sites with extreme values of depth of coverage when  
474 comparing to the average genome coverage: below the maximum of one third of the mean depth of  
475 coverage ( $DoC$ ) and eight, that is,  $\max\left(\frac{DoC}{3}, 8\right)$ , and depth above twice the average depth; v)  
476 filtering out of sites with the field QUAL below 30.

477

478

479                   b. Imputation using GLIMPSE

480 We imputed the downsampled genomes using GLIMPSE<sup>12</sup> v1.1.1. First, we used GLIMPSE\_chunk  
481 to split chromosomes into chunks of sizes in the range 1 – 2 Mb and included a 200-kb buffer region  
482 at each side of a chunk. Second, imputation was performed with GLIMPSE\_phase on the chunks  
483 with parameters *--burn* 10, *--main* 15 and *--pbwt-depth* 2, with 1000 Genomes as the reference  
484 panel. And then, we ligated the imputed chunks with GLIMPSE\_ligate.

485                   c. Imputation using Beagle4.1

486 To evaluate how GLIMPSE performs compared to Beagle4.1<sup>10</sup> regarding imputation of low-  
487 coverage ancient genomes, we imputed the same data, but restricted to 1.0x, with Beagle4.1 with  
488 parameters *--modelscale* 2 and *--niterations* 0, that represent a trade-off between accurate results  
489 and running times.

490                   d. Imputation accuracy evaluation

491 We used GLIMPSE\_concordance to quantify imputation accuracy and genotype concordance,  
492 having the high-coverage data as validation. Only sites that were covered by at least eight reads  
493 and whose genotypes have a posterior probability of 0.9999 or more were used in validation. With  
494 GLIMPSE\_concordance we obtained (i) imputation accuracy, that is, the squared correlation  
495 between dosage fields VCF/DS (DS varies between 0 and 2 that can be seen as a mean genotype  
496 value obtained from the genotype probabilities:  $DS = \sum_{i=0}^2 iGP_i$ , where  $GP_i$  is the genotype  
497 probability for genotype  $i$ ) in imputed and validation datasets, divided in MAF bins, and (ii) genotype  
498 discordance, i.e., proportion of sites for which the most likely imputed genotype is different from the  
499 corresponding validation genotype for homozygous reference allele (RR), heterozygous (RA) and  
500 homozygous alternative allele sites (AA). We also estimated non-reference-discordance, NRD,  
501 defined as  $NRD = (e_{RR} + e_{RA} + e_{AA}) / (m_{RA} + m_{AA} + e_{RR} + e_{RA} + e_{AA})$ , where  $e_X$  and  $m_X$  stand for the  
502 number of errors and matches at sites of type X, respectively. NRD is an error rate which excludes

503 the number of correctly imputed homozygous reference allele sites, which are the majority, thus  
504 giving more weight to imputation errors at alternative allele sites.

## 505 2. Downstream analyses

### 506 a. File processing

507 We filtered the imputed data by imposing that, for each variant site, the genotype probability  
508 (VCF/GP) for the most confidently imputed genotype to be at least 0.80. Then, we generated two  
509 datasets with different minor allele frequency (MAF) filters: MAF>5% (6,550,734 SNPs) for the data  
510 used in PCA and ROH analyses, and MAF>1% (11,553,877 SNPs) for admixture analysis, since  
511 with stricter MAF filters we would lose sites that distinguish the different populations. We used  
512 PLINK<sup>52</sup> v1.90 to merge 1000 Genomes, high-coverage and imputed data into one file. In the case  
513 of PCA and admixture analyses, we intersected the resulting sites with the ones present in the Allen  
514 Ancient DNA Resource (AADR) data genotyped at the 1240K array sites<sup>44</sup>, that we refer to as the  
515 “1240K dataset” hereafter.

### 516 b. PCA

517 We performed PCA with smartpca (eigensoft<sup>53</sup> package v7.2.1) without outlier removal (*outliermode*:  
518 2). The 10 first principal components (*numoutvec*: 10) were calculated using the 1000 Genomes  
519 genetic data and both the imputed and high-coverage data were projected onto the resulting  
520 components (*Isqproject*: YES).

521

522 To perform the t-tests to test if there were significant differences in coordinates between validation  
523 and corresponding 1x imputed genomes for the first 10 principal components, we used the default R  
524 function *t.test*, running it in unpaired mode to test whether the mean of the differences was  
525 significantly different from 0 with a two-sided alternative hypothesis.

526

527 c. Admixture analysis

528 We estimated admixture proportions for 21 ancient Europeans with the software ADMIXTURE<sup>43</sup>  
529 v1.3.0 in unsupervised mode. For the reference panel, we used a subset of the 1240K dataset  
530 containing nine western hunter gatherers, 26 Anatolian farmers and 26 individuals of Steppe  
531 ancestry<sup>44</sup> (see **Table S2**). Contrary to the imputed and high-coverage genomes, the reference data  
532 are pseudo-haploid. We merged the reference panel with each of the imputation datasets (different  
533 coverages) with plink v1.90. We removed sites that were missing in more than 30% of the  
534 individuals. We proceeded similarly for the high-coverage dataset. We ran ADMIXTURE on seven  
535 configurations: merged reference panel and high-coverage individuals, and merged reference panel  
536 with each of the six imputed data sets (with initial coverage between 0.1x and 2.0x). For each  
537 configuration and number of clusters, we ran ADMIXTURE for K between two and five with 20  
538 replicates (20 different seeds) and chose the replicate that yielded the largest log-likelihood value. In  
539 the final run, we obtained the standard error and bias of the admixture estimates using the option --  
540 *B 1000* that calculates these quantities with bootstrapping and 1000 replicates.

541 d. Runs of homozygosity (ROH)

542 We estimated ROH with plink v1.90 with the parameters<sup>45</sup> *--homozyg, --homozyg-density 50, --*  
543 *homozyg-gap 100, --homozyg-kb 500, --homozyg-snp 50, --homozyg-window-het 1, --homozyg-*  
544 *window-snp 50* and *--homozyg-window-threshold 0.05*. We estimated ROH twice: i) using  
545 transversion sites only, thus excluding sites that can be affected by aDNA damage, and ii) using  
546 both transversions and transitions.

547

548 3. Datasets

549 a. Ancient genomes in this study

550 The 43 downsampled and imputed ancient genomes (**Table S1**) were obtained from the “Ancient  
551 Genomes dataset” that was compiled in the context of the study of Allentoft et al<sup>23</sup>.

552 b. Reference panel for imputation

553 We used a version of 1000 Genomes v5 phase 3 (2,504 genomes)<sup>16</sup>, where the genomes were re-  
554 sequenced at 30x, and subsequently phased using TOPMed<sup>17</sup>, and with sites present in TOPMed.  
555 Only biallelic sites were retained (~90 million SNPs) and singletons were excluded. This panel was  
556 lifted over from build 38 to hg19 reference genome assembly using Picard liftoverVCF  
557 (<https://gatk.broadinstitute.org/hc/en-us/articles/360037060932-LiftoverVcf-Picard->), with  
558 hg38ToHg19 chain from the University of California, Santa Cruz liftOver tool  
559 (<http://hgdownload.cse.ucsc.edu/goldenpath/hg38/liftOver/>).

560  
561 c. Reference panel for genetic clustering analyses

562 We extracted a subset of the 1240K dataset<sup>44</sup> containing ancient individuals of the three ancestries  
563 we were interested in: 26 Anatolian farmers (Anatolia\_N), 26 Steppe individuals (Steppe\_EMBA),  
564 and nine western-hunter gatherers (WHG), as specified in **Table S2**, to the exclusion of Loschbour,  
565 a genome that was also included in the dataset of 42 high-coverage genomes that we downsampled  
566 and imputed. We converted this subset from eigenstrat format to plink bed using the convertf  
567 command (eigensoft package v7.2.1). After that, we used plink v1.190 to do all of the data handling,  
568 such as merging plink bed files and filtering out sites with high missingness.

569 **References**

- 570 1. Briggs, A. W. *et al.* Patterns of damage in genomic DNA sequences from a Neandertal. *Proc.*  
571 *Natl. Acad. Sci. U. S. A.* **104**, 14616–14621 (2007).
- 572 2. Patterson, N. *et al.* Ancient admixture in human history. *Genetics* **192**, 1065–1093 (2012).
- 573 3. Günther, T. & Jakobsson, M. Population genomic analyses of DNA from ancient remains. in  
574 *Handbook of Statistical Genomics* **1**, 295–324 (Wiley, 2019).
- 575 4. Ringbauer, H., Novembre, J. & Steinrücken, M. Parental relatedness through time revealed  
576 by runs of homozygosity in ancient DNA. *Nat. Commun.* **12**, 5425 (2021).

- 577 5. Günther, T. & Nettelblad, C. The presence and impact of reference bias on population  
578 genomic studies of prehistoric human populations. *PLoS Genet.* **15**, (2019).
- 579 6. Li, N. & Stephens, M. Modeling Linkage Disequilibrium and Identifying Recombination  
580 Hotspots Using Single-Nucleotide Polymorphism Data. *Genetics* **165**, 2213–2233 (2003).
- 581 7. Marchini, J. *et al.* A comparison of phasing algorithms for trios and unrelated individuals. *Am.*  
582 *J. Hum. Genet.* **78**, 437–450 (2006).
- 583 8. Marchini, J. & Howie, B. Genotype imputation for genome-wide association studies. *Nature*  
584 *Reviews Genetics* **11**, 499–511 (2010).
- 585 9. Howie, B. N., Donnelly, P. & Marchini, J. A flexible and accurate genotype imputation method  
586 for the next generation of genome-wide association studies. *PLoS Genet.* **5**, (2009).
- 587 10. Browning, B. L. & Browning, S. R. Genotype Imputation with Millions of Reference Samples.  
588 *Am. J. Hum. Genet.* **98**, 116–126 (2016).
- 589 11. Spiliopoulou, A., Colombo, M., Orchard, P., Agakov, F. & McKeigue, P. GenImp: Fast  
590 imputation to large reference panels using genotype likelihoods from ultralow coverage  
591 sequencing. *Genetics* **206**, 91–104 (2017).
- 592 12. Rubinacci, S., Ribeiro, D. M., Hofmeister, R. J. & Delaneau, O. Efficient phasing and  
593 imputation of low-coverage sequencing data using large reference panels. *Nat. Genet.* **53**,  
594 120–126 (2021).
- 595 13. Wasik, K. *et al.* Comparing low-pass sequencing and genotyping for trait mapping in  
596 pharmacogenetics. *BMC Genomics* **22**, 1–7 (2021).
- 597 14. Davies, R. W. *et al.* Rapid genotype imputation from sequence with reference panels. *Nat.*  
598 *Genet.* **53**, 1104–1111 (2021).
- 599 15. McCarthy, S. *et al.* A reference panel of 64,976 haplotypes for genotype imputation. *Nat.*  
600 *Genet.* **48**, 1279–1283 (2016).
- 601 16. Auton, A. *et al.* A global reference for human genetic variation. *Nature* **526**, 68–74 (2015).

- 602 17. Taliun, D. *et al.* Sequencing of 53,831 diverse genomes from the NHLBI TOPMed Program.  
603 *Nature* **590**, 290–299 (2021).
- 604 18. Martiniano, R. *et al.* The population genomics of archaeological transition in west Iberia:  
605 Investigation of ancient substructure using imputation and haplotype-based methods. *PLoS*  
606 *Genet.* **13**, e1006852 (2017).
- 607 19. Haber, M. *et al.* A Genetic History of the Near East from an aDNA Time Course Sampling  
608 Eight Points in the Past 4,000 Years. *Am. J. Hum. Genet.* **107**, 149–157 (2020).
- 609 20. Saube, T. *et al.* Ancient genomes reveal structural shifts after the arrival of Steppe-related  
610 ancestry in the Italian Peninsula. *Curr. Biol.* **31**, 2576–2591.e12 (2021).
- 611 21. Clemente, F. *et al.* The genomic history of the Aegean palatial civilizations. *Cell* **184**, 2565–  
612 2586.e21 (2021).
- 613 22. Cox, S. L. *et al.* Predicting skeletal stature using ancient DNA. *Am. J. Biol. Anthropol.* **177**,  
614 162–174 (2022).
- 615 23. Allentoft, M. E. *et al.* Population Genomics of Stone Age Eurasia. *bioRxiv* **36**,  
616 2022.05.04.490594 (2022).
- 617 24. Hofreiter, M., Serre, D. & Pääbo, S. Ancient DNA. *Nat. Rev. Genet.* **2**, 353–359 (2001).
- 618 25. Hui, R., D’Atanasio, E., Cassidy, L. M., Scheib, C. L. & Kivisild, T. Evaluating genotype  
619 imputation pipeline for ultra-low coverage ancient genomes. *Sci. Rep.* **10**, 1–8 (2020).
- 620 26. Browning, B. L., Tian, X., Zhou, Y. & Browning, S. R. Fast two-stage phasing of large-scale  
621 sequence data. *Am. J. Hum. Genet.* **108**, 1880–1890 (2021).
- 622 27. Ausmees, K., Sanchez-Quinto, F., Jakobsson, M. & Nettelblad, C. An empirical evaluation of  
623 genotype imputation of ancient DNA. *G3 Genes|Genomes|Genetics* (2022).
- 624 28. Browning, S. R. & Browning, B. L. Rapid and Accurate Haplotype Phasing and Missing-Data  
625 Inference for Whole-Genome Association Studies By Use of Localized Haplotype Clustering.  
626 *Am. J. Hum. Genet.* **81**, 1084–1097 (2007).

- 627 29. Li, H. *et al.* The Sequence Alignment/Map format and SAMtools. *Bioinforma. Appl. NOTE* **25**,  
628 2078–2079 (2009).
- 629 30. Schroeder, H. *et al.* Unraveling ancestry, kinship, and violence in a Late Neolithic mass  
630 grave. *Proc. Natl. Acad. Sci. U. S. A.* **166**, 10705–10710 (2019).
- 631 31. Das, S., Abecasis, G. R. & Browning, B. L. Genotype imputation from large reference panels.  
632 *Annu. Rev. Genomics Hum. Genet.* **19**, 73–96 (2018).
- 633 32. Bergström, A. *et al.* Insights into human genetic variation and population history from 929  
634 diverse genomes. *Science* **367**, (2020).
- 635 33. Gronau, I., Hubisz, M. J., Gulko, B., Danko, C. G. & Siepel, A. Bayesian inference of ancient  
636 human demography from individual genome sequences. *Nat. Genet.* **43**, 1031–  
637 1034 (2011).
- 638 34. Schlebusch, C. M. *et al.* Southern African ancient genomes estimate modern human  
639 divergence to 350,000 to 260,000 years ago. *Science* **358**, 652–655 (2017).
- 640 35. Browning, S. R. & Browning, B. L. Haplotype phasing: Existing methods and new  
641 developments. *Nat. Rev. Genet.* **12**, 703–714 (2011).
- 642 36. Delaneau, O., Zagury, J. F. & Marchini, J. Improved whole-chromosome phasing for disease  
643 and population genetic studies. *Nat. Methods* **10**, 5–6 (2013).
- 644 37. Delaneau, O., Zagury, J. F., Robinson, M. R., Marchini, J. L. & Dermitzakis, E. T. Accurate,  
645 scalable and integrative haplotype estimation. *Nat. Commun.* **10**, (2019).
- 646 38. Sikora, M. *et al.* Ancient genomes show social and reproductive behavior of early Upper  
647 Paleolithic foragers. *Science* **358**, 659–662 (2017).
- 648 39. Fu, Q. *et al.* Genome sequence of a 45,000-year-old modern human from western Siberia.  
649 *Nature* **514**, 445–449 (2014).
- 650 40. Gallego Llorente, M. *et al.* Ancient Ethiopian genome reveals extensive Eurasian admixture  
651 throughout the African continent. *Science* **350**, 820–822 (2015).



- 652 41. Ceballos, F. C., Joshi, P. K., Clark, D. W., Ramsay, M. & Wilson, J. F. Runs of homozygosity:  
653 windows into population history and trait architecture. *Nat. Rev. Genet.* **19**, 220–234 (2018).
- 654 42. Lazaridis, I. *et al.* Ancient human genomes suggest three ancestral populations for present-  
655 day Europeans. *Nature* **513**, 409–413 (2014).
- 656 43. Alexander, D. H., Novembre, J. & Lange, K. Fast model-based estimation of ancestry in  
657 unrelated individuals. *Genome Res.* **19**, 1655–1664 (2009).
- 658 44. Fu, Q. *et al.* An early modern human from Romania with a recent Neanderthal ancestor.  
659 *Nature* **524**, 216–219 (2015).
- 660 45. Cassidy, L. M. *et al.* Neolithic and Bronze Age migration to Ireland and establishment of the  
661 insular atlantic genome. *Proc. Natl. Acad. Sci. U. S. A.* **113**, 368–373 (2016).
- 662 46. Moreno-Mayar, J. V. *et al.* Early human dispersals within the Americas. *Science* **362**, (2018).
- 663 47. Bycroft, C. *et al.* The UK Biobank resource with deep phenotyping and genomic data. *Nature*  
664 **562**, 203–209 (2018).
- 665 48. Link, V. *et al.* ATLAS: Analysis Tools for Low-depth and Ancient Samples. *bioRxiv* 105346  
666 (2017). doi:10.1101/105346
- 667 49. Jun, G., Wing, M. K., Abecasis, G. R. & Kang, H. M. An efficient and scalable analysis  
668 framework for variant extraction and refinement from population scale DNA sequence data.  
669 *Genome Res.* **25**, gr.176552.114 (2015).
- 670 50. Altshuler, D. M. *et al.* Integrating common and rare genetic variation in diverse human  
671 populations. *Nat.* 2010 4677311 **467**, 52–58 (2010).
- 672 51. Karolchik, D. *et al.* The UCSC Table Browser data retrieval tool. *Nucleic Acids Res.* **32**,  
673 (2004).
- 674 52. Purcell, S. *et al.* PLINK: A tool set for whole-genome association and population-based  
675 linkage analyses. *Am. J. Hum. Genet.* **81**, 559–575 (2007).
- 676 53. Price, A. L. *et al.* Principal components analysis corrects for stratification in genome-wide

677 association studies. *Nat. Genet.* **38**, 904–909 (2006).

678

679 **Author contributions**

680 B.S.d.M., A.-S.M. and O.D. designed the study and drafted the paper. B.S.d.M. and O.D. performed  
681 the experiments. S.R. helped with imputation. D.I.C.D., C.E.G.A, M.E.A., M.S. and E.W. helped with  
682 the population genetics analyses. H.S., M.E.A., N.N.J., M.H.S., P.W., A.S., M.M.P. generated and  
683 provided the ancient trio data. This work has been supervised by O.D. and A.-S.M. All authors  
684 helped with interpretation and reviewed the final manuscript.

685

686 **Acknowledgments**

687 B.S.d.M. was supported by a Swiss National Science Foundation (SNSF) project grant  
688 (PP00P3\_176977) to O.D. and by a European Research Council grant (grant agreement no.  
689 679330) to A.-S.M. S.R. was supported by Swiss National Science Foundation (SNSF) project grant  
690 (PP00P3\_176977). D.I.C.D. was supported by the European Research Council grant (grant  
691 agreement no. 679330) to A.-S.M. C.E.G.A. was supported by the National Institute of General  
692 Medical Sciences of the National Institutes of Health under award number R35GM142939. N.N.J.  
693 was supported by Aarhus University Research Foundation. H.S. was supported by the European  
694 Research Council (grant agreement no. 101045643).
