# Supplementary material for: Imputation of ancient genomes
Source: bioRxiv or medRxiv preprint supplement (doi:10.1101/2022.07.19.500636), 2022-07-20
Supplement: Supplementary file [file media-1.pdf]

# Supplementary information

1

2 Bárbara Sousa da Mota<sup>1,2</sup>, Simone Rubinacci<sup>1,2</sup>, Diana Ivette Cruz Dávalos<sup>1,2</sup>, Carlos Eduardo G.  
3 Amorim<sup>3</sup>, Martin Sikora<sup>4</sup>, Niels N. Johannsen<sup>5</sup>, Marzena Szmyt<sup>6</sup>, Piotr Włodarczak<sup>7</sup>, Anita  
4 Szczepanek<sup>7,8</sup>, Marcin M. Przybyła<sup>9</sup>, Hannes Schroeder<sup>10</sup>, Morten E. Allentoft<sup>11,4</sup>, Eske  
5 Willerslev<sup>4,12,13,14</sup>, Anna-Sapfo Malaspinas<sup>1,2\*</sup>@, Olivier Delaneau<sup>1,2\*</sup>@

6

7 <sup>1</sup>Department of Computational Biology, University of Lausanne, Switzerland

8 <sup>2</sup>Swiss Institute of Bioinformatics, University of Lausanne, Switzerland

9 <sup>3</sup>Department of Biology, California State University, Northridge, California, United States of America

10 <sup>4</sup>Lundbeck Foundation GeoGenetics Centre, Globe Institute, University of Copenhagen, Copenhagen, Denmark

11 <sup>5</sup>Department of Archaeology and Heritage Studies, Aarhus University, Denmark

12 <sup>6</sup>Institute for Eastern Research, Adam Mickiewicz University in Poznań, Poznań, Poland

13 <sup>7</sup>Institute of Archaeology and Ethnology, Polish Academy of Sciences, Kraków, Poland

14 <sup>8</sup>Department of Anatomy, Jagiellonian University, Medical College, Kraków, Poland

15 <sup>9</sup>Institute of Archaeology, Jagiellonian University, Kraków, Poland

16 <sup>10</sup>The Globe Institute, Faculty of Health and Medical Sciences, University of Copenhagen, Copenhagen,  
17 Denmark

18 <sup>11</sup>Trace and Environmental DNA (TrEnD) Laboratory, School of Molecular and Life Science, Curtin University,  
19 Australia

20 <sup>12</sup>GeoGenetics Group, Department of Zoology, University of Cambridge, Cambridge, UK

21 <sup>13</sup>Wellcome Sanger Institute, Wellcome Genome Campus, Cambridge, UK

22 <sup>14</sup>MARUM, University of Bremen, Bremen, Germany

23

24 \* Corresponding authors: [annasapfo.malaspinas@unil.ch](mailto:annasapfo.malaspinas@unil.ch), [olivier.delaneau@unil.ch](mailto:olivier.delaneau@unil.ch)

25 @ Joint last authors

## 26 1. Effect of using different genotype callers to generate genotype 27 likelihoods, i.e., input for imputation

28 In order to determine whether the choice of genotype caller to calculate genotype likelihoods prior to  
29 imputation influences the quality of the imputed calls, we compared the accuracy of imputation using  
30 genotype likelihoods obtained with two different callers i) bcftools<sup>1</sup>, a tool designed to handle  
31 modern DNA, and ii) ATLAS<sup>2</sup>, a genotype caller that models and/or estimates deamination patterns  
32 and takes these into account when calling genotypes for ancient genomes. In the case of ATLAS,  
33 we empirically estimated the damage pattern before proceeding to genotype calling. In addition, to  
34 compute the imputation accuracy, we used two different validation sets, where calls were obtained  
35 using i) bcftools and ii) ATLAS. **Figure S1** shows imputation accuracy obtained with the four  
36 previously described configurations for a subset of 16 genomes downsampled to 1.0x prior to  
37 imputation. For a few genomes, such as Lovelock2<sup>3</sup> and SIII<sup>4</sup>, there were no noticeable differences  
38 between the different configurations. In most cases, the most striking differences were between  
39 validation sets, regardless of the genotype likelihoods set used for imputation. Indeed, the accuracy  
40 curves tend to cluster by validation rather than genotype likelihood set. However, in the case of  
41 Sumidouro5, there is a larger difference between the two different genotype likelihood  
42 configurations for the same validation set, particularly at sites with minor allele frequency (MAF)  
43 below 5%. For this genome, with 40% frequency of C-to-T substitutions at the reads' ends, the  
44 highest accuracy was obtained with both imputation using genotype likelihoods and validation calls  
45 obtained with ATLAS. In conclusion, imputation calls were not significantly affected by the choice of  
46 tool to call genotype likelihoods for most of the cases here analyzed and, therefore, we chose to  
47 calculate genotype likelihoods using bcftools with no further filtering before imputation. However, the  
48 two genotype callers used to obtain the validation calls from the high-coverage genomes had clear  
49 differences and we further investigated the differences between them in the next section.

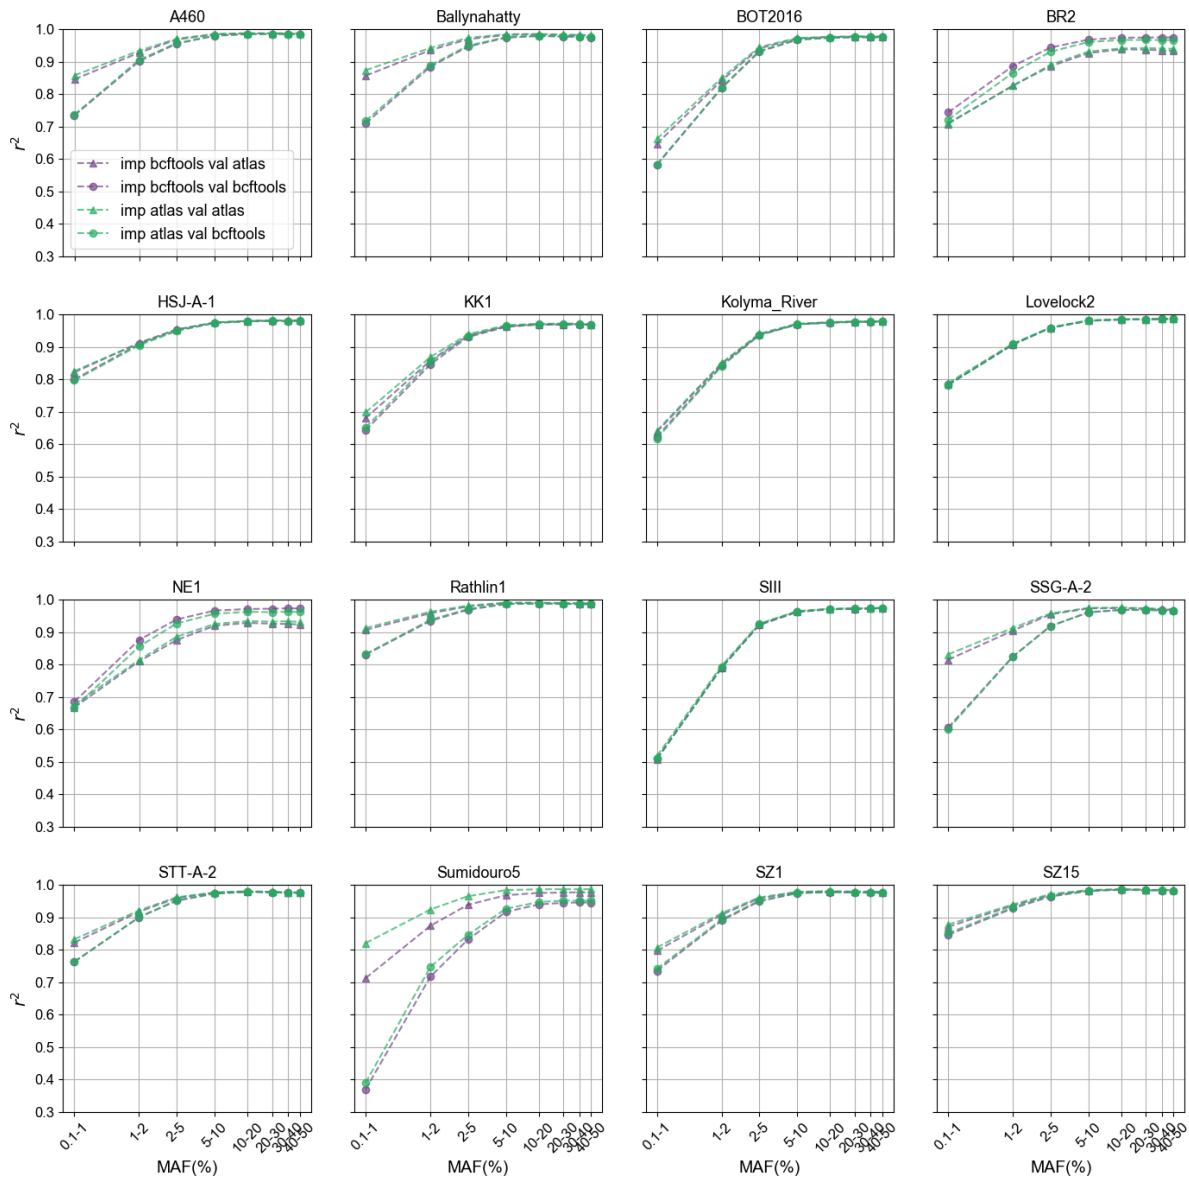

50

51 Figure S1: Imputation accuracy for a subset of 16 imputed 1.0x genomes, where imputation was  
 52 performed from genotype likelihoods calculated with i) bcftools (purple) and ii) ATLAS (green). Two  
 53 different validation sets were used in this analyses that differ in the tool used to call genotypes: i)  
 54 bcftools (circles) and ii) ATLAS (triangles).

55

56

57

58

59

60

61

62

## 63 2. Validation dataset

64 In order to be able to assess imputation accuracy when imputing low-coverage ancient genomes,  
65 we resorted to downsampling and imputing ancient genomes with average depth of coverage above  
66 10x, using the high-coverage genomes as ground truth. However, these high-coverage genomes  
67 are not free from the inherent ancient DNA challenges, in particular, base deamination. This  
68 constitutes a problem in determining what the true genotypes are for a particular genome, thus  
69 affecting how well we can validate imputation results in the context of this work. To determine how  
70 we can best circumvent this problem, we tried different approaches to generate the validation calls  
71 that were expected to decrease the impact of ancient DNA damage on the resulting genotype calls  
72 in the case of four 1x ancient genomes, namely, RISE1168<sup>5,6</sup>, SIII<sup>4</sup> (UDG-treated), Sumidouro5<sup>3</sup> (a  
73 highly damaged genome) and WC1<sup>7</sup> (with intermediately high damage levels). Firstly, we called  
74 genotypes with ATLAS, a genotype caller that models the deamination patterns at the ends of  
75 reads, except for RISE1168, that includes paired-end libraries in addition to single-end libraries.  
76 Then, prior to genotype calling with bcftools, we trimmed five base pairs from the reads in the bam  
77 files. We also followed the filtering approach carried out in previous studies<sup>3</sup>: i) we called genotypes  
78 with bcftools using reads with mapping quality of at least 30 and bases with quality 20 (“-q 30 -Q  
79 20”), as well as the recommended option -C 50; ii) we retained only the sites present in the 1000  
80 Genomes accessible genome strict mask; iii) we excluded sites located in regions known to contain  
81 repetitions; iv) we removed sites that have depth below the maximum of one third of the mean depth  
82 of coverage and eight, as this is typically the minimum depth of coverage for which we can  
83 confidently call genotypes, and sites that have depth above twice the mean depth; v) we retained  
84 sites for which the field QUAL is equal or greater than 30. Finally, we used these different genotype  
85 call sets as validation when evaluating imputation accuracy for the four aforementioned genomes.  
86 We learnt that the application of the aforementioned five filters gives a consistently higher  
87 agreement between imputation and validation calls, even though it does not yield the highest  
88 accuracy for the four genomes (**Figure S2**). In the case of Sumidouro5, ATLAS outperformed the  
89 other approaches, with the five filters approach in second place, but ATLAS performance was not

90 consistent across samples. The trimming approach yielded intermediate accuracy curves, in  
 91 general, but, compared to the five-filter option in the case of Sumidouro5, it yielded much lower  
 92 values at rare variants (MAF<2%). Given these results, we chose to generate the validation calls  
 93 used in all the analyses in the main paper by applying the five-filter approach. However, we are  
 94 aware that more accurate calls could be obtained by applying stricter filters for particular genomes  
 95 that contain more degradation, including Sumidouro5, as was done in Moreno-Mayar et al.<sup>3</sup> We  
 96 decided, instead, to apply the same approach to all 42 high-coverage genomes to expedite the  
 97 process and have consistent datasets.

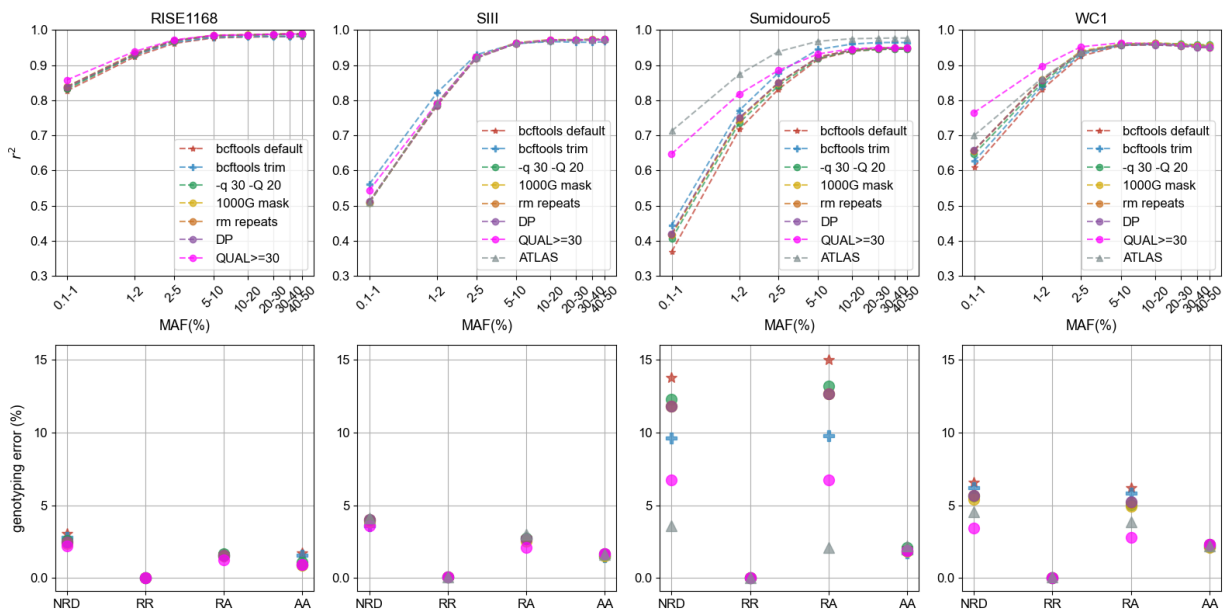

98  
 99 Figure S2: Effect of applying quality filters to validation call set on imputation accuracy (first row)  
 100 and genotype discordance (second row) for four different genomes, organized by column  
 101 (RISE1168<sup>5,6</sup>, SIII<sup>4</sup>, Sumidouro5<sup>3</sup> and WC1<sup>7</sup>). The imputed genomes had been downsampled to 1x  
 102 coverage. The filters were applied in the following order: i) genotype calling with bcftools using  
 103 reads with mapping quality of at least 30 and base quality 20 (“-q 30 -Q 20”), as well as the  
 104 recommended option -C 50; ii) only sites present in the 1000 Genomes strict mask are retained; iii)  
 105 exclusion of sites that are located in regions known to contain repetitions; iv) filtering out of sites that  
 106 have depth below the maximum of one third of the mean depth of coverage and eight and sites that  
 107 have depth above twice the mean depth; v) retaining sites for which the field QUAL is equal or  
 108 greater than 30. For each validation and filter, the same imputed data were used in this analysis.

### 109 3. Individual samples

110 Table S1: Information on the ancient genomes used in the benchmark of imputation of low-coverage  
111 genomes: id, modern country where remains were found, age of remains in years before present  
112 (yBP), depth of coverage, and population of the 1000 Genomes panel whose minor allele frequency  
113 (MAF) was used in imputation accuracy analyses for each of the individuals, when applicable. AFR:  
114 Africa, AME: America, EAS: East Asia, EUR: Europe, SAS: South East Asia, All: overall allele  
115 frequency in 1000 Genomes. For RISE1160, a low-coverage genome, we do not indicate a MAF  
116 label, as we did not estimate imputation accuracy as a function of MAF for this genome. In the case  
117 of the ancient trio age (RISE1159, RISE1160 and RISE1168), we report a time span obtained for  
118 the mass grave as a whole. This range is the result of a model that took into consideration the  
119 number of contemporaneous individuals in the grave, radiocarbon dating of the different remains, as  
120 well as the ontogenetic constraints on how much the ages (e.g., parent/offspring relations) can  
121 vary<sup>6</sup>.

| ID           | Country      | Age range (yBP) | Coverage | MAF label | Study                                                                                                       |
|--------------|--------------|-----------------|----------|-----------|-------------------------------------------------------------------------------------------------------------|
| atp016       | Spain        | 4867-5212       | 13       | EUR       | Valdiosera et al., <i>PNAS</i> (2018) <sup>8</sup>                                                          |
| Stuttgart    | Germany      | 7020-7260       | 16       | EUR       | Lazaridis et al., <i>Nature</i> (2014) <sup>9</sup>                                                         |
| Loschbour    | Luxembourg   | 7940-8160       | 18       | EUR       | Lazaridis et al., <i>Nature</i> (2014) <sup>9</sup>                                                         |
| Ballynahatty | Ireland      | 4970-5293       | 10       | EUR       | Cassidy et al., <i>PNAS</i> (2016) <sup>10</sup>                                                            |
| sf12         | Sweden       | 8757-9033       | 59       | EUR       | Günther et al., <i>PloS Biology</i> (2018) <sup>11</sup>                                                    |
| NE1          | Hungary      | 7021-7256       | 18       | EUR       | Gamba et al., <i>Nat. Com.</i> (2014) <sup>12</sup>                                                         |
| RISE1159     | Poland       | 4726-4830       | 27       | EUR       | Schroeder et al., <i>PNAS</i> (2019) <sup>6</sup> ;<br>Allentoft et al., <i>bioRxiv</i> (2022) <sup>5</sup> |
| RISE1160     | Poland       | 4726-4830       | 5        | -         | Schroeder et al., <i>PNAS</i> (2019) <sup>6</sup> ;<br>Allentoft et al., <i>bioRxiv</i> (2022) <sup>5</sup> |
| RISE1168     | Poland       | 4726-4830       | 19       | EUR       | Schroeder et al., <i>PNAS</i> (2019) <sup>6</sup> ;<br>Allentoft et al., <i>bioRxiv</i> (2022) <sup>5</sup> |
| SIII         | Russia       | 33031-35154     | 11       | EUR       | Sikora et al., <i>Science</i> (2017) <sup>4</sup>                                                           |
| Rathlin1     | Ireland      | 3835 – 3976     | 11       | EUR       | Cassidy et al., <i>PNAS</i> (2016) <sup>10</sup>                                                            |
| SSG-A-2      | Iceland      | 950 – 1100      | 10       | EUR       | Ebenesersdottir et al., <i>Science</i> (2018) <sup>13</sup>                                                 |
| HSJ-A-1      | Iceland      | 950 – 1080      | 29       | EUR       | Ebenesersdottir et al., <i>Science</i> (2018) <sup>13</sup>                                                 |
| STT-A-2      | Iceland      | 950 – 1050      | 14       | EUR       | Ebenesersdottir et al., <i>Science</i> (2018) <sup>13</sup>                                                 |
| VK1          | Greenland    | 750 – 950       | 12       | EUR       | Margaryan et al., <i>Nature</i> (2020) <sup>14</sup>                                                        |
| BR2          | Hungary      | 3060 – 3220     | 18       | EUR       | Gamba et al., <i>Nat. Com.</i> (2014) <sup>12</sup>                                                         |
| SZ15         | Hungary      | 1346 – 1538     | 11       | EUR       | Amorim et al., <i>Nat. Com.</i> (2018) <sup>15</sup>                                                        |
| SZ3          | Hungary      | 1346 – 1538     | 11       | EUR       | Amorim et al., <i>Nat. Com.</i> (2018) <sup>15</sup>                                                        |
| SZ4          | Hungary      | 1347 – 1538     | 10       | EUR       | Amorim et al., <i>Nat. Com.</i> (2018) <sup>15</sup>                                                        |
| SZ45         | Hungary      | 1347 – 1538     | 10       | EUR       | Amorim et al., <i>Nat. Com.</i> (2018) <sup>15</sup>                                                        |
| SZ43         | Hungary      | 1347 – 1538     | 12       | EUR       | Amorim et al., <i>Nat. Com.</i> (2018) <sup>15</sup>                                                        |
| SZ1          | Hungary      | 3220 – 5320     | 11       | EUR       | Amorim et al., <i>Nat. Com.</i> (2018) <sup>15</sup>                                                        |
| baa01        | South Africa | 1831 – 1986     | 14       | AFR       | Schlebusch et al., <i>Science</i> (2017) <sup>16</sup>                                                      |
| ela01        | South Africa | 453 – 533       | 13       | AFR       | Schlebusch et al., <i>Science</i> (2017) <sup>16</sup>                                                      |
| new01        | South Africa | 327 – 508       | 11       | AFR       | Schlebusch et al., <i>Science</i> (2017) <sup>16</sup>                                                      |
| I10871       | Cameroon     | 7800 – 7970     | 15       | AFR       | Lipson et al., <i>Nature</i> (2020) <sup>17</sup>                                                           |
| Mota         | Ethiopia     | 4419 – 4525     | 10       | AFR       | Gallego Llorente et al., <i>Science</i> (2015) <sup>18</sup>                                                |
| KK1          | Georgia      | 9550 – 9890     | 12       | EUR       | Jones et al., <i>Nat. Com.</i> , (2015) <sup>19</sup>                                                       |
| WC1          | Iran         | 9032 – 9405     | 10       | EUR       | Broushaki et al., <i>Science</i> (2016) <sup>7</sup>                                                        |
| BOT2016      | Kazakhstan   | 5318 – 5582     | 14       | EUR       | Damgaard et al., <i>Science</i> (2018) <sup>20</sup>                                                        |
| Yamnaya      | Kazakhstan   | 4837 – 4968     | 26       | EUR       | Damgaard et al., <i>Science</i> (2018) <sup>20</sup>                                                        |
| Andaman      | India        | 30 – 150        | 17       | SAS       | Moreno-Mayar et al., <i>Science</i> (2018) <sup>3</sup>                                                     |
| UstIshim     | Russia       | 42560 – 47480   | 35       | All       | Fu et al., <i>Nature</i> (2014) <sup>21</sup>                                                               |
| Yana         | Russia       | 30950 – 32950   | 27       | All       | Sikora et al., <i>Nature</i> (2019) <sup>22</sup>                                                           |
| Kolyma_River | Russia       | 9665 – 9906     | 15       | All       | Sikora et al., <i>Nature</i> (2019) <sup>22</sup>                                                           |
| USR1         | USA          | 11270 – 11600   | 17       | AME       | Moreno-Mayar et al., <i>Nature</i> (2018) <sup>3</sup>                                                      |
| AHUR_2064    | USA          | 10770 – 11170   | 19       | AME       | Moreno-Mayar et al., <i>Science</i> (2018) <sup>3</sup>                                                     |
| Lovelock2    | USA          | 1818 – 1942     | 15       | AME       | Moreno-Mayar et al., <i>Science</i> (2018) <sup>3</sup>                                                     |
| Lovelock3    | USA          | 567 – 687       | 19       | AME       | Moreno-Mayar et al., <i>Science</i> (2018) <sup>3</sup>                                                     |
| Saqqaq       | Greenland    | 3600 – 4170     | 13       | AME       | Rasmussen et al., <i>Nature</i> (2010) <sup>23</sup>                                                        |
| Clovis       | USA          | 12572 – 12726   | 15       | AME       | Moreno-Mayar et al., <i>Science</i> (2018) <sup>3</sup>                                                     |
| Sumidouro5   | Brazil       | 10258 – 10552   | 16       | AME       | Moreno-Mayar et al., <i>Science</i> (2018) <sup>3</sup>                                                     |
| A460         | Chile        | 4430 – 4850     | 11       | AME       | Moreno-Mayar et al., <i>Science</i> (2018) <sup>3</sup>                                                     |

122 4. Imputation accuracy for transitions and transversions and method  
123 comparison

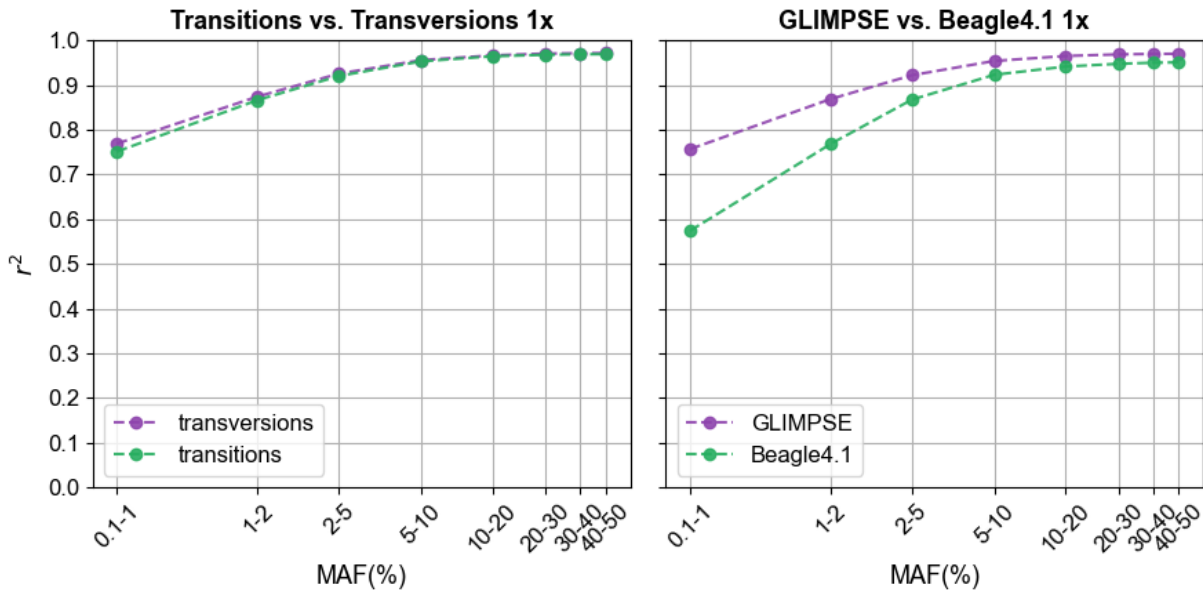

124  
125 Figure S3: Imputation accuracy,  $r^2$ , for the aggregate of the 42 ancient genomes, previously  
126 downsampled to 1x, as a function of 1000 Genomes Project minor allele frequency (MAF), 0.1-50%,  
127 regarding (left to right) i) transitions (green) compared to transversions (purple), and ii) comparison  
128 between imputation methods, Beagle4.1<sup>24</sup> (green) vs. GLIMPSE1.1.1<sup>25</sup> (purple).

129  
130  
131  
132  
133  
134  
135  
136  
137  
138  
139  
140  
141  
142  
143  
144



145 5. PCA with focus on Europeans, several coverages

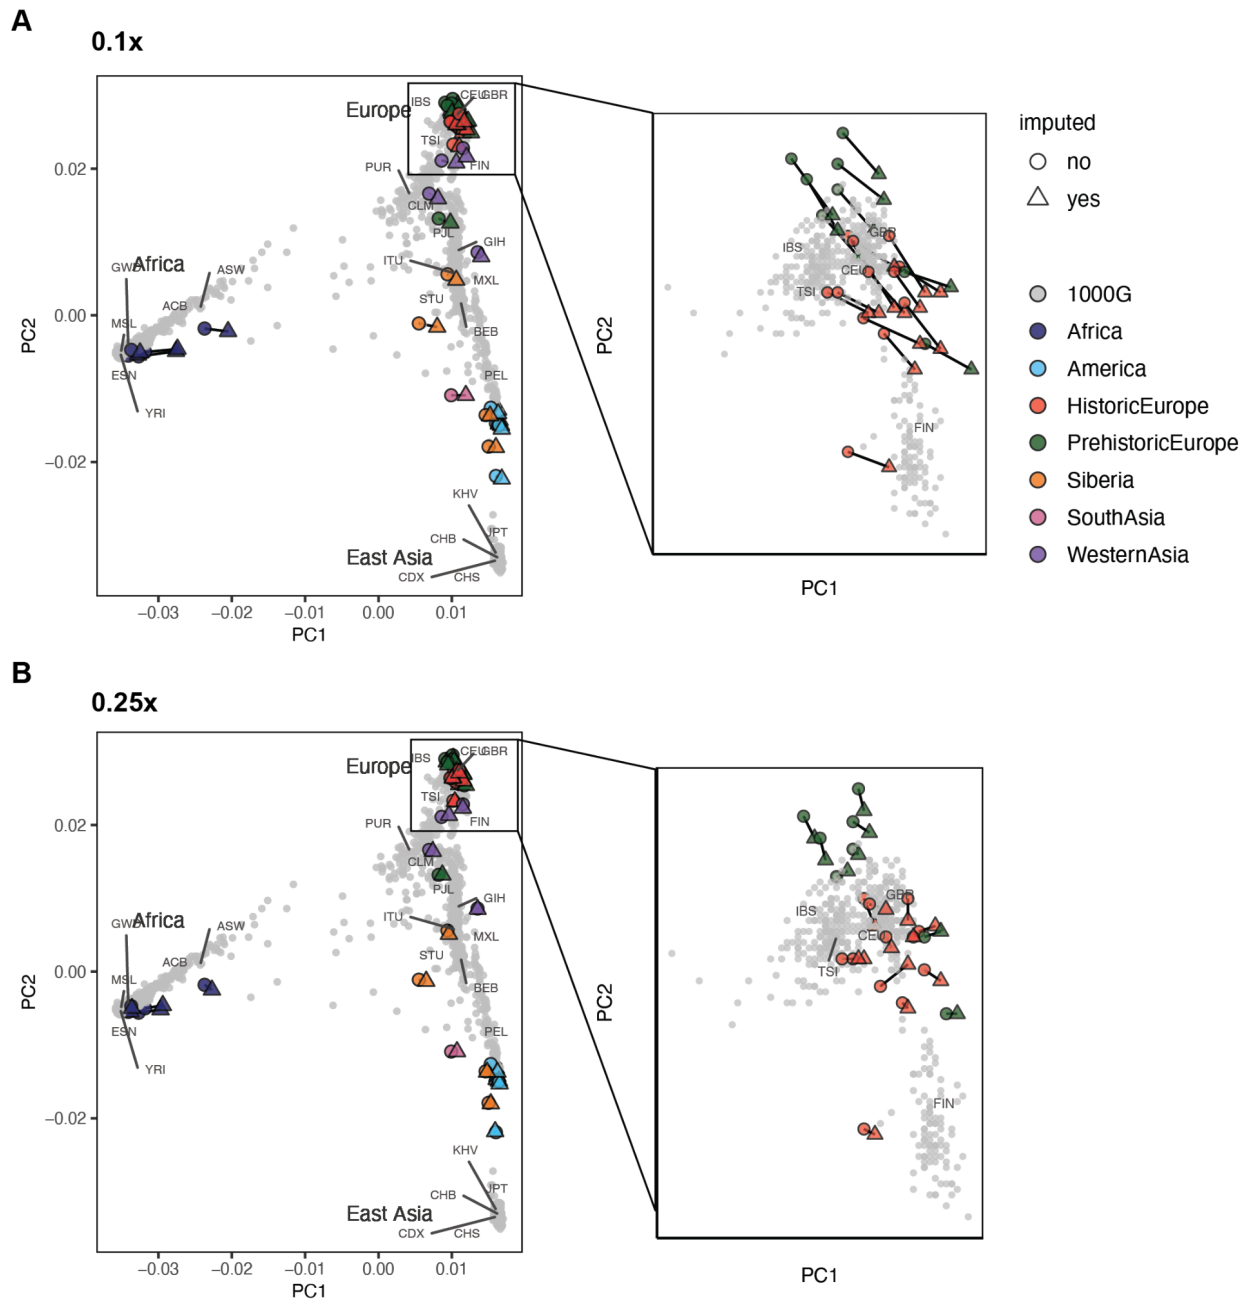

146  
 147 Figure S4: Principal component analysis (PCA) of imputed 0.1x (A) and 0.25x (B) and high-  
 148 coverage ancient genetic data, and present-day data in 1000 Genomes reference panel (gray).  
 149 Plots show individual coordinates along the two first principal components, zooming-in on the  
 150 individuals of European ancestry. Imputed data points are represented by triangles and high-  
 151 coverage ancient data by full circles. Corresponding imputed and high-coverage data are connected  
 152 by a line.

153

## 6. Genetic clustering analyses: from K=2 to K=5 clustering populations

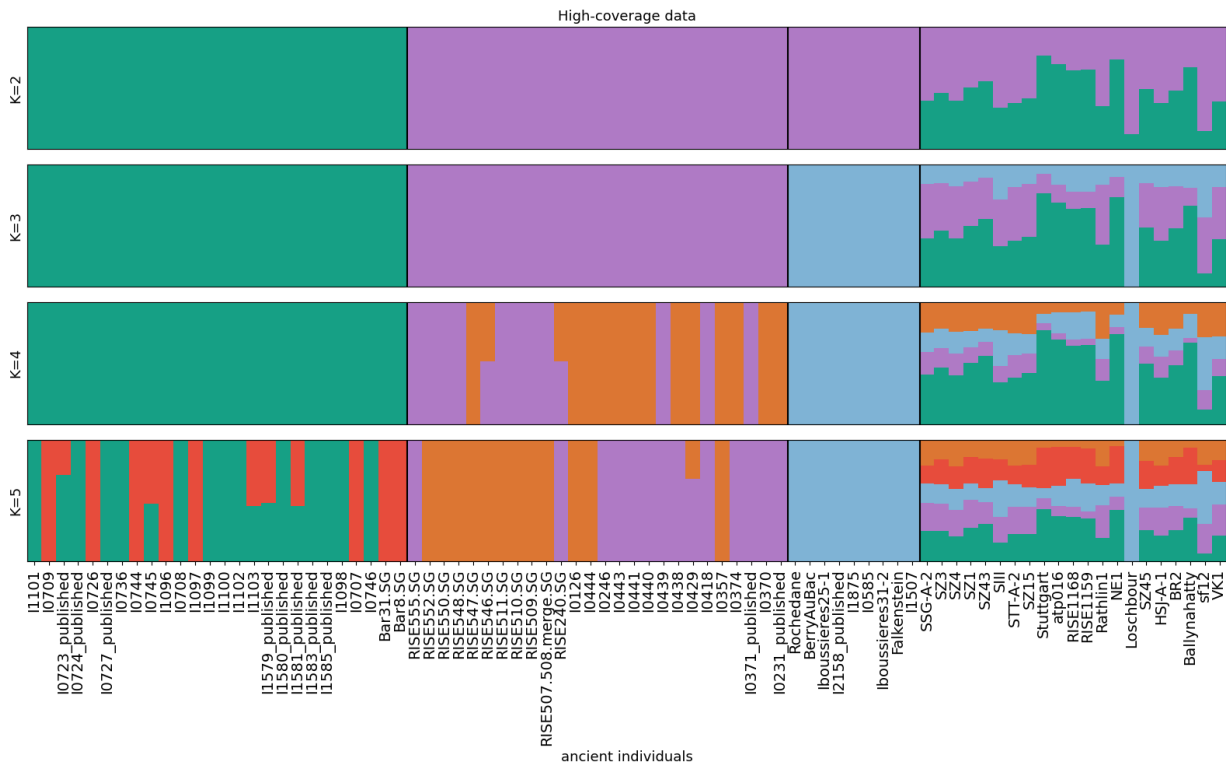

155

156

Figure S5: Genetic clustering results obtained from running unsupervised ADMIXTURE<sup>26</sup> with the genetic data of a subset of individuals in 1240K dataset<sup>27</sup> and high-coverage data (rightmost box).

157

158

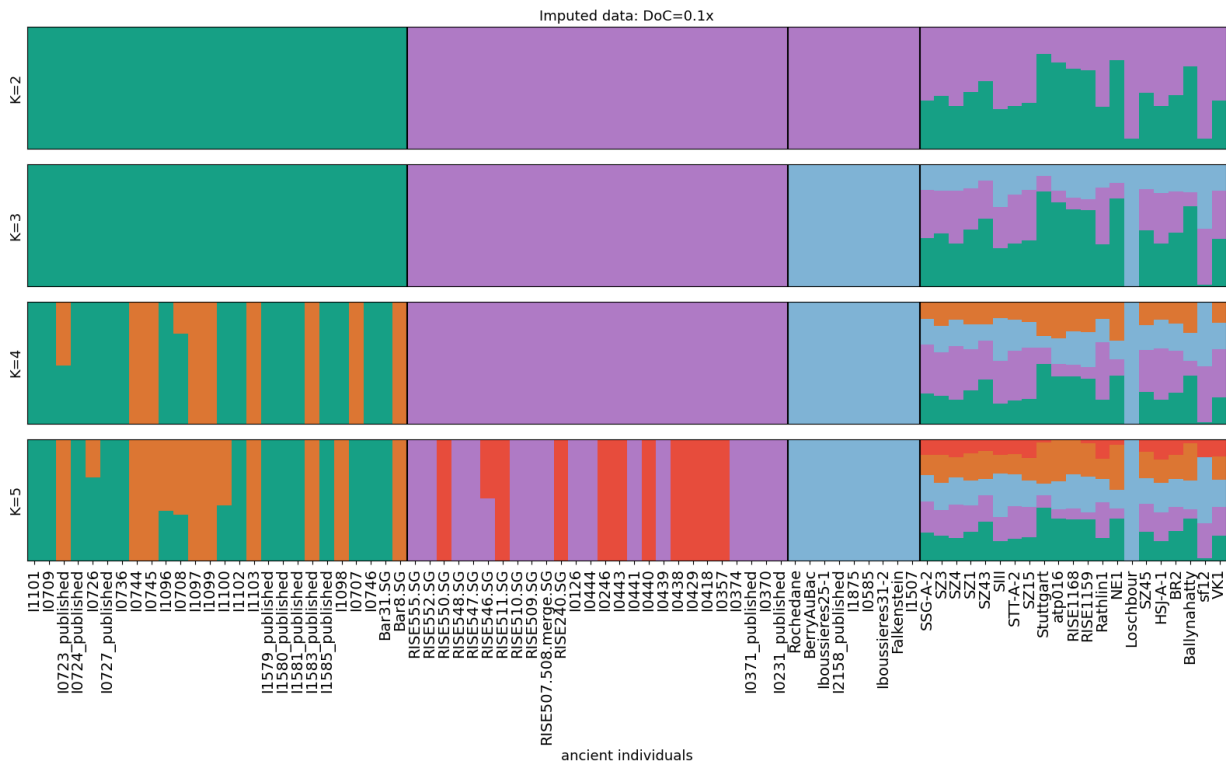

159

160 Figure S6: Genetic clustering results obtained from running unsupervised ADMIXTURE with the  
 161 genetic data of a subset of individuals in 1240K dataset and imputed 0.1x data (rightmost box).

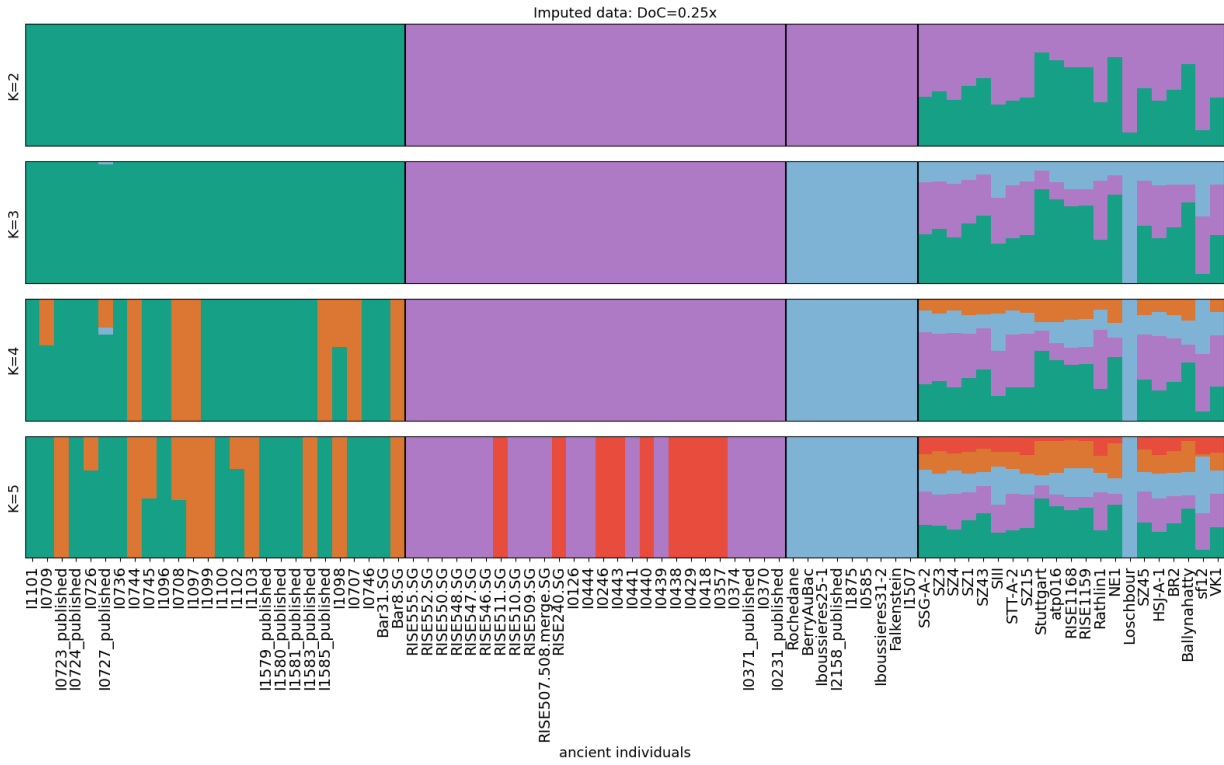

162  
 163 Figure S7: Genetic clustering results obtained from running unsupervised ADMIXTURE with the  
 164 genetic data of a subset of individuals in 1240K dataset and imputed 0.25x data (rightmost box).

165

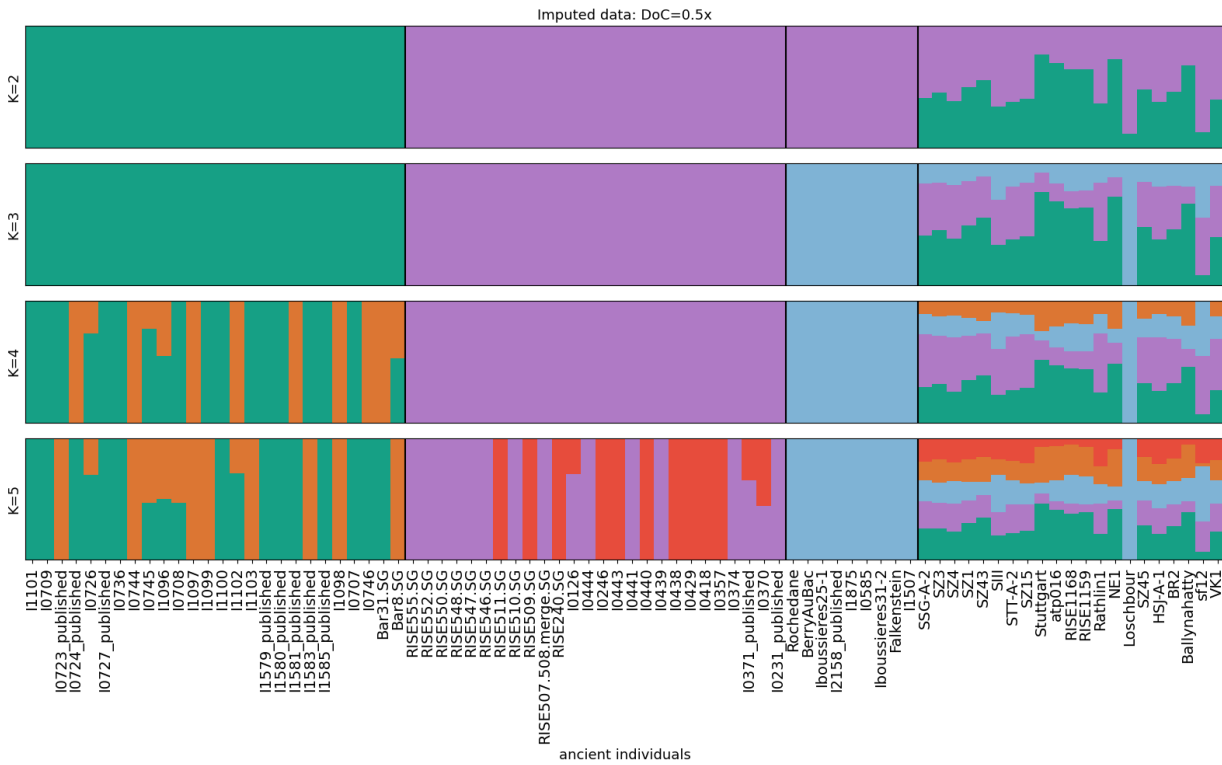

166  
 167 Figure S8: Genetic clustering results obtained from running unsupervised ADMIXTURE with the  
 168 genetic data of a subset of individuals in 1240K dataset and imputed 0.5x data (rightmost box).  
 169

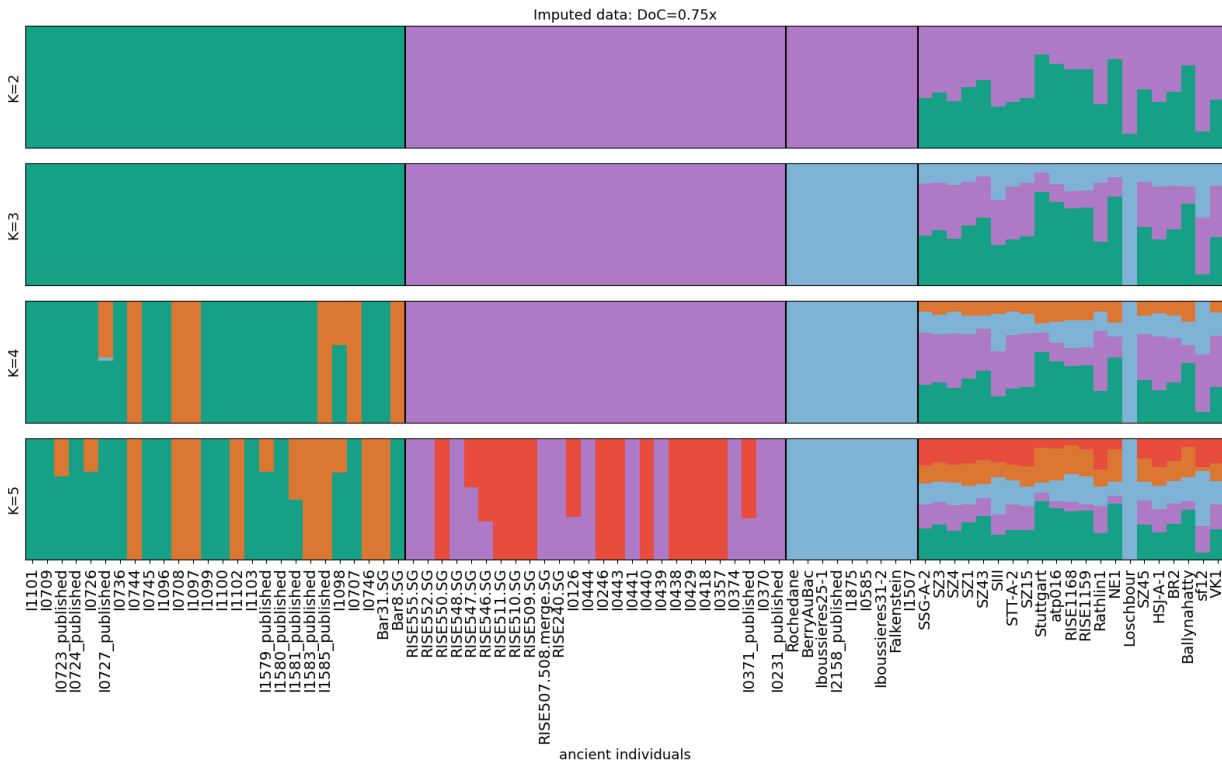

170  
 171 Figure S9: Genetic clustering results obtained from running unsupervised ADMIXTURE with the  
 172 genetic data of a subset of individuals in 1240K dataset and imputed 0.75x data (rightmost box).

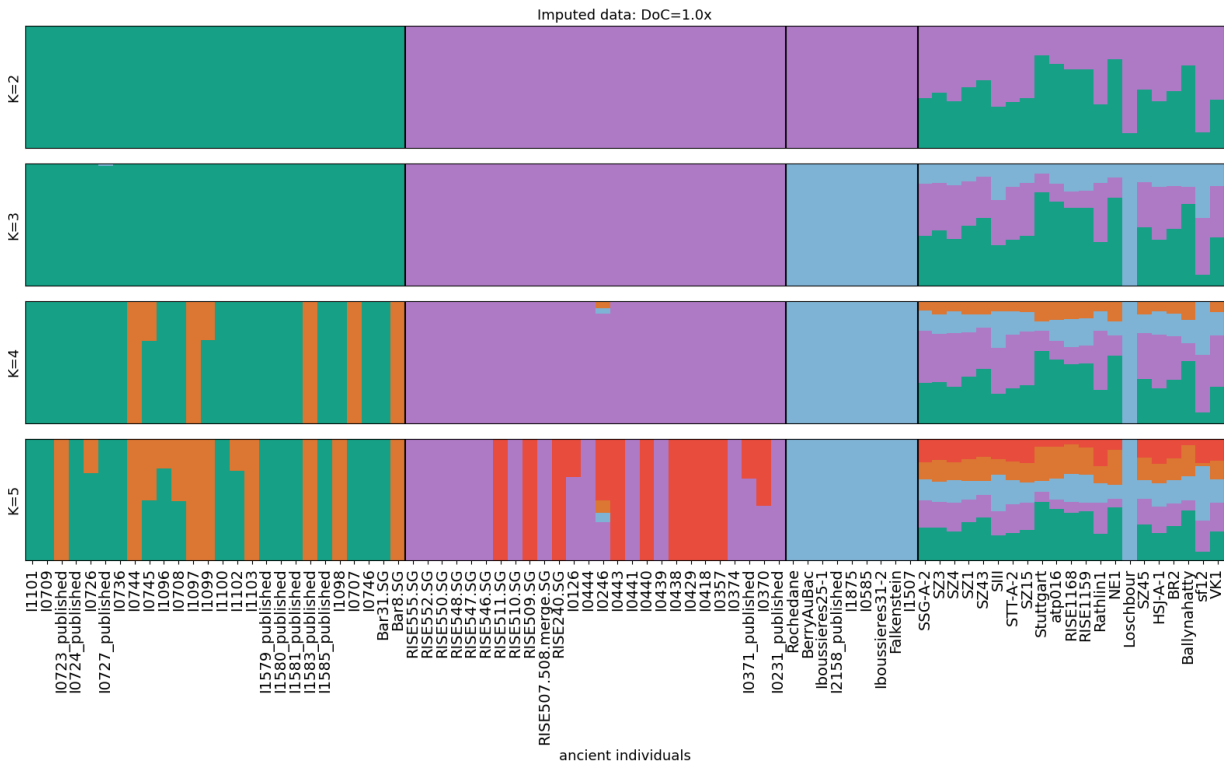

174

175 Figure S10: Genetic clustering results obtained from running unsupervised ADMIXTURE with the

176 genetic data of a subset of individuals in 1240K dataset and imputed 1.0x data (rightmost box).

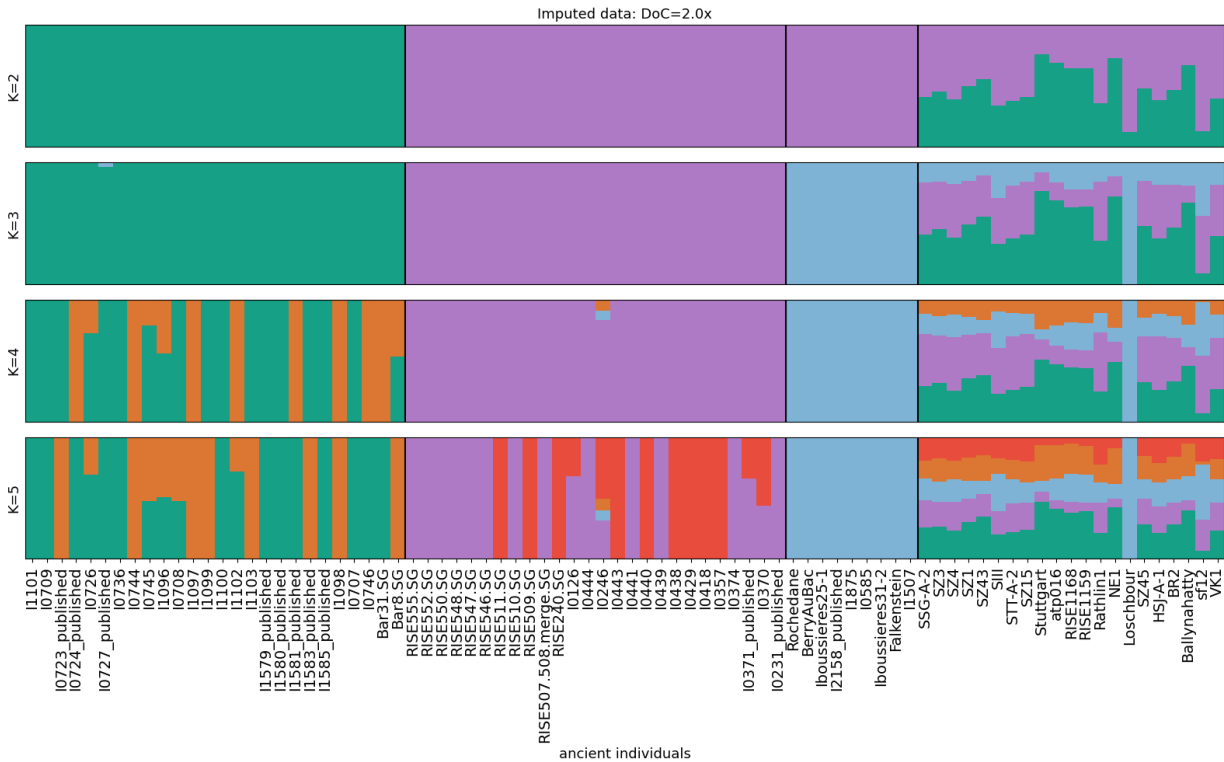

177

178 Figure S11: Genetic clustering results obtained from running unsupervised ADMIXTURE with the

179 genetic data of a subset of individuals in 1240K dataset and imputed 2.0x data (rightmost box).

180 Table S2: Subset of the 1240K dataset<sup>27</sup> used as reference in the genetic clustering analyses. The  
 181 individuals are grouped by population: Neolithic Anatolia (“Anatolia\_N”), western hunter-gatherer  
 182 (“WHG”), Early to Middle Bronze Age Steppe (“Steppe\_EMBA”).

| <b>Population</b> | <b>Individual</b>    |
|-------------------|----------------------|
| Anatolia_N        | Bar31.SG             |
| Anatolia_N        | Bar8.SG              |
| Anatolia_N        | I0707                |
| Anatolia_N        | I0708                |
| Anatolia_N        | I0709                |
| Anatolia_N        | I0723_published      |
| Anatolia_N        | I0724_published      |
| Anatolia_N        | I0726                |
| Anatolia_N        | I0727_published      |
| Anatolia_N        | I0736                |
| Anatolia_N        | I0744                |
| Anatolia_N        | I0745                |
| Anatolia_N        | I0746                |
| Anatolia_N        | I1096                |
| Anatolia_N        | I1097                |
| Anatolia_N        | I1098                |
| Anatolia_N        | I1099                |
| Anatolia_N        | I1100                |
| Anatolia_N        | I1101                |
| Anatolia_N        | I1102                |
| Anatolia_N        | I1103                |
| Anatolia_N        | I1579_published      |
| Anatolia_N        | I1580_published      |
| Anatolia_N        | I1581_published      |
| Anatolia_N        | I1583_published      |
| Anatolia_N        | I1585_published      |
| WHG               | BerryAuBac           |
| WHG               | Falkenstein          |
| WHG               | I0585                |
| WHG               | I1507                |
| WHG               | I1875                |
| WHG               | I2158_published      |
| WHG               | Iboussieres25-1      |
| WHG               | Iboussieres31-2      |
| WHG               | Rochedane            |
| Steppe_EMBA       | I0126                |
| Steppe_EMBA       | I0231_published      |
| Steppe_EMBA       | I0246                |
| Steppe_EMBA       | I0357                |
| Steppe_EMBA       | I0370                |
| Steppe_EMBA       | I0371_published      |
| Steppe_EMBA       | I0374                |
| Steppe_EMBA       | I0418                |
| Steppe_EMBA       | I0429                |
| Steppe_EMBA       | I0438                |
| Steppe_EMBA       | I0439                |
| Steppe_EMBA       | I0440                |
| Steppe_EMBA       | I0441                |
| Steppe_EMBA       | I0443                |
| Steppe_EMBA       | I0444                |
| Steppe_EMBA       | RISE240.SG           |
| Steppe_EMBA       | RISE507.508.merge.SG |
| Steppe_EMBA       | RISE509.SG           |
| Steppe_EMBA       | RISE510.SG           |
| Steppe_EMBA       | RISE511.SG           |
| Steppe_EMBA       | RISE546.SG           |
| Steppe_EMBA       | RISE547.SG           |
| Steppe_EMBA       | RISE548.SG           |
| Steppe_EMBA       | RISE550.SG           |
| Steppe_EMBA       | RISE552.SG           |
| Steppe_EMBA       | RISE555.SG           |
|                   |                      |

183

## 7. ROH estimates for Sumidouro5

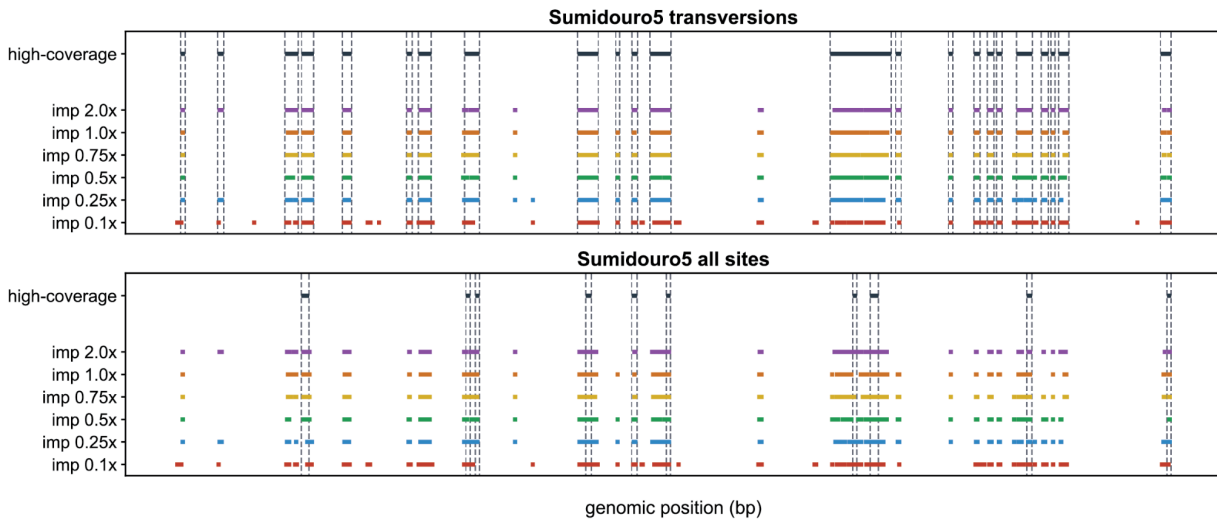

185

186 Figure S12: ROH segments identified in chromosome 10 for high-coverage and imputed data (DoC  
 187 between 0.1x and 2.0x) for Sumidouro5. Top: ROH obtained using all sites. Bottom: ROH estimated  
 188 using transversion sites only.

189

## 190 References

- 191 1. Li, H. *et al.* The Sequence Alignment/Map format and SAMtools. *Bioinforma. Appl. NOTE* **25**,  
 192 2078–2079 (2009).
- 193 2. Link, V. *et al.* ATLAS: Analysis Tools for Low-depth and Ancient Samples. *bioRxiv* 105346  
 194 (2017). doi:10.1101/105346
- 195 3. Moreno-Mayar, J. V. *et al.* Early human dispersals within the Americas. *Science* **362**, (2018).
- 196 4. Sikora, M. *et al.* Ancient genomes show social and reproductive behavior of early Upper  
 197 Paleolithic foragers. *Science* **358**, 659–662 (2017).
- 198 5. Allentoft, M. E. *et al.* Population Genomics of Stone Age Eurasia. *bioRxiv* **36**,  
 199 2022.05.04.490594 (2022).
- 200 6. Schroeder, H. *et al.* Unraveling ancestry, kinship, and violence in a Late Neolithic mass  
 201 grave. *Proc. Natl. Acad. Sci. U. S. A.* **166**, 10705–10710 (2019).
- 202 7. Broushaki, F. *et al.* Early Neolithic genomes from the eastern Fertile Crescent. *Science* **353**,

- 203 499–503 (2016).
- 204 8. Valdiosera, C. *et al.* Four millennia of Iberian biomolecular prehistory illustrate the impact of  
205 prehistoric migrations at the far end of Eurasia. *Proc. Natl. Acad. Sci. U. S. A.* **115**, 3428–  
206 3433 (2018).
- 207 9. Lazaridis, I. *et al.* Ancient human genomes suggest three ancestral populations for present-  
208 day Europeans. *Nature* **513**, 409–413 (2014).
- 209 10. Cassidy, L. M. *et al.* Neolithic and Bronze Age migration to Ireland and establishment of the  
210 insular atlantic genome. *Proc. Natl. Acad. Sci. U. S. A.* **113**, 368–373 (2016).
- 211 11. Günther, T. *et al.* Population genomics of Mesolithic Scandinavia : Investigating early  
212 postglacial migration routes and high-latitude adaptation. *PLoS Biol.* **16**, e2003703 (2018).
- 213 12. Gamba, C. *et al.* Genome flux and stasis in a five millennium transect of European prehistory.  
214 *Nat. Commun.* **2014 51 5**, 1–9 (2014).
- 215 13. Ebenesersdóttir, S. S. *et al.* Ancient genomes from Iceland reveal the making of a human  
216 population. *Science* **360**, 1028–1032 (2018).
- 217 14. Margaryan, A. *et al.* Population genomics of the Viking world. *Nature* **585**, 390–396 (2020).
- 218 15. Amorim, C. E. G. *et al.* Understanding 6th-century barbarian social organization and  
219 migration through paleogenomics. *Nat. Commun.* **9**, 3547 (2018).
- 220 16. Schlebusch, C. M. *et al.* Southern African ancient genomes estimate modern human  
221 divergence to 350,000 to 260,000 years ago. *Science* **358**, 652–655 (2017).
- 222 17. Lipson, M. *et al.* Ancient West African foragers in the context of African population history.  
223 *Nature* **577**, 665–670 (2020).
- 224 18. Gallego Llorente, M. *et al.* Ancient Ethiopian genome reveals extensive Eurasian admixture  
225 throughout the African continent. *Science* **350**, 820–822 (2015).
- 226 19. Jones, E. R. *et al.* Upper Palaeolithic genomes reveal deep roots of modern Eurasians. *Nat.*  
227 *Commun.* **2015 61 6**, 1–8 (2015).
- 228 20. de Barros Damgaard, P. *et al.* The first horse herders and the impact of early Bronze Age  
229 steppe expansions into Asia. *Science* **360**, (2018).
- 230 21. Fu, Q. *et al.* Genome sequence of a 45,000-year-old modern human from western Siberia.



- 231 *Nature* **514**, 445–449 (2014).
- 232 22. Sikora, M. *et al.* The population history of northeastern Siberia since the Pleistocene. *Nature*  
233 **570**, 182–188 (2019).
- 234 23. Rasmussen, M. *et al.* Ancient human genome sequence of an extinct Palaeo-Eskimo. *Nature*  
235 **463**, 757–762 (2010).
- 236 24. Browning, B. L. & Browning, S. R. Genotype Imputation with Millions of Reference Samples.  
237 *Am. J. Hum. Genet.* **98**, 116–126 (2016).
- 238 25. Rubinacci, S., Ribeiro, D. M., Hofmeister, R. J. & Delaneau, O. Efficient phasing and  
239 imputation of low-coverage sequencing data using large reference panels. *Nat. Genet.* **53**,  
240 120–126 (2021).
- 241 26. Alexander, D. H., Novembre, J. & Lange, K. Fast model-based estimation of ancestry in  
242 unrelated individuals. *Genome Res.* **19**, 1655–1664 (2009).
- 243 27. Fu, Q. *et al.* An early modern human from Romania with a recent Neanderthal ancestor.  
244 *Nature* **524**, 216–219 (2015).
- 245
